# Supplementary material for: Understanding the mechanisms, regioselectivies and enantioselectivities of the DMAP-catalyzed [2 + 4] cycloaddition of γ-methyl allenoate and phenyl(phenyldiazenyl)methanone
Source: Royal Society of Chemistry journal article supplement (doi:10.1039/c6ra16321a), 2016-01-01
Supplement: c6ra16321a1.pdf [file c6ra16321a1.pdf]

*Supporting Information*

**Understanding the mechanisms, regioselectivities and  
enantioselectivities of the DMAP-catalyzed [2+4] cycloaddition of  $\gamma$ -  
methyl allenoate and phenyl(phenyldiazenyl)methanone**

**Yan Li\*, Shiwen Du**

*School of Petroleum and Chemical Engineering, Dalian University of Technology,  
2 Dagong Road, New District of Liaodong Bay, Panjin City, Liaoning Province,  
People's Republic of China, 124221*

Corresponding person: Yan Li

E-mail: yanli\_101@dlut.edu.cn

Telephone: 15142738951

Fax: 86-427-2631111

Fig S1. Free energy profile of the conversion between **1** and **1a** (**1'** and **1a'**). The solvation-corrected relative free energies at SMD(toluene)/M06-2X/6-311++G(d,p) level are given in kcal/mol.

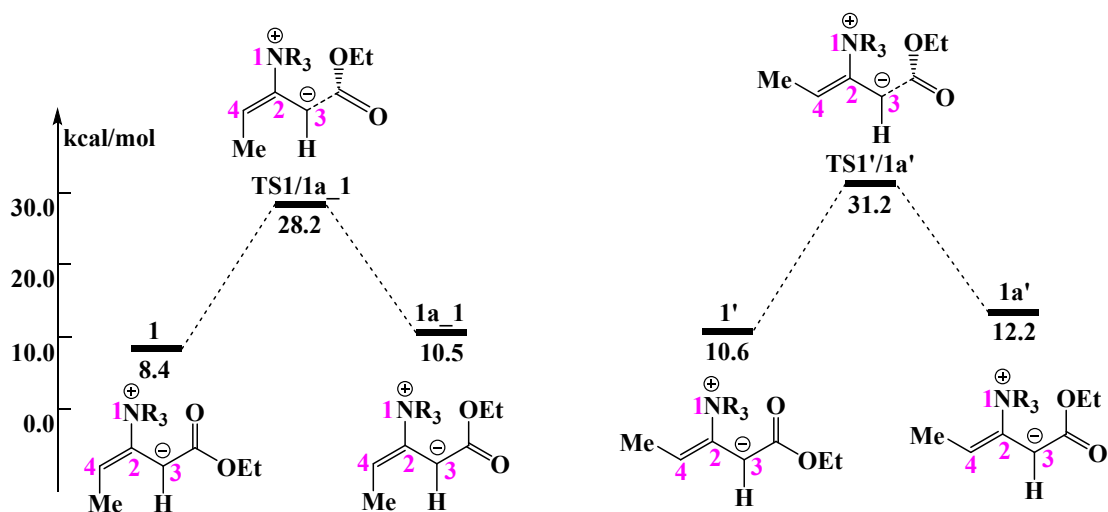

It should be noted that for **1**→**1a** conversion, **1** has to undergo C2-C3 bond rotation to generate **1a\_1**, followed by the rotation of C3-ester C bond to afford **1a**. On the basis of our calculations, the C2-C3 bond rotation transition state **TS1/1a\_1** is 4.2 kcal/mol higher than **TSR<sub>1</sub>/1** (28.2 kcal/mol vs 24.0 kcal/mol), which makes the transformation of **1**→**1a\_1** much less favorable, the transition state for the conversion of **1a\_1**→**1a** is thus not searched.

Fig S2. Free energy profile of the reaction pathways proceeded via 1'. The solvation-corrected relative free energies at SMD(toluene)/M06-2X/6-311++G(d,p) level are given in kcal/mol.

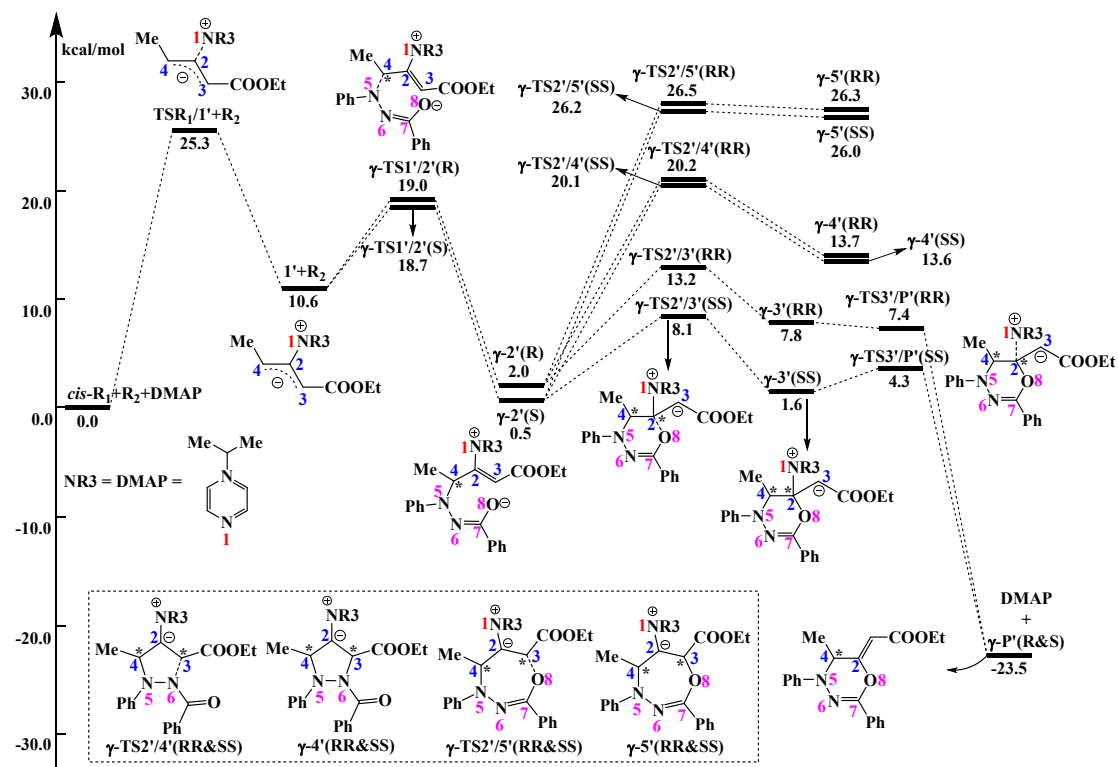

**Cartesian coordinates of all stationary points for the DMAP-catalyzed reaction of  $\gamma$ -methyl allenoate with phenyl(phenyldiazenyl)methanone in toluene:**

**DMAP**

|   |             |             |             |
|---|-------------|-------------|-------------|
| N | -1.90783500 | 0.00107300  | 0.00185500  |
| C | 1.58988300  | -1.13342300 | 0.00441700  |
| C | 0.20447700  | -1.19886400 | 0.00627400  |
| C | -0.54444900 | 0.00022700  | 0.00009600  |
| C | -2.63144200 | -1.25573800 | -0.01156400 |
| H | 2.16229200  | -2.05880000 | 0.01032800  |
| H | -0.27681300 | -2.16874300 | 0.01558900  |
| H | -2.37730500 | -1.85493300 | -0.89462000 |
| H | -2.41990500 | -1.85227500 | 0.88497700  |
| H | -3.70094600 | -1.04942700 | -0.03959000 |
| C | 1.59142200  | 1.13094300  | -0.00988900 |
| C | 0.20610900  | 1.19829300  | -0.00801100 |
| C | -2.62994800 | 1.25869500  | 0.01538200  |
| H | 2.16508400  | 2.05553200  | -0.01733700 |
| H | -0.27384200 | 2.16884600  | -0.01599900 |
| H | -2.41914800 | 1.85437600  | -0.88191200 |
| H | -2.37390500 | 1.85821300  | 0.89765100  |
| H | -3.69963300 | 1.05356400  | 0.04519400  |
| N | 2.30410200  | -0.00172800 | -0.00373100 |

***cis-R<sub>1</sub>***

|   |             |             |             |
|---|-------------|-------------|-------------|
| C | -0.76228800 | -0.77406300 | -0.03357500 |
| H | -0.60132200 | -1.84653800 | -0.09717300 |

|   |             |             |             |
|---|-------------|-------------|-------------|
| C | -1.97154600 | -0.26003100 | -0.00155300 |
| C | -3.16806600 | 0.25638400  | 0.03622400  |
| H | -3.63670500 | 0.51679900  | -0.91294200 |
| C | 0.43831300  | 0.09796300  | 0.02052300  |
| O | 1.55710600  | -0.64223700 | -0.01883900 |
| O | 0.43788500  | 1.30678000  | 0.09304700  |
| C | 2.79797200  | 0.08396300  | 0.03562900  |
| C | 3.91733200  | -0.92932700 | -0.02570700 |
| H | 2.82226800  | 0.66561200  | 0.96226300  |
| H | 2.83244100  | 0.78360700  | -0.80501300 |
| H | 4.88100000  | -0.41516500 | 0.02742500  |
| H | 3.85451600  | -1.63096400 | 0.81042500  |
| H | 3.87947400  | -1.49551200 | -0.96016000 |
| C | -3.93848800 | 0.52902700  | 1.30105600  |
| H | -4.17270200 | 1.59545500  | 1.37376400  |
| H | -4.88572200 | -0.01890100 | 1.29465800  |
| H | -3.36742500 | 0.23562300  | 2.18359900  |

***trans-R<sub>1</sub>***

|   |             |             |             |
|---|-------------|-------------|-------------|
| C | -0.85426900 | 0.99964400  | 0.03004100  |
| H | -1.03709300 | 2.07029100  | 0.05931900  |
| C | -1.84303000 | 0.13432000  | -0.00612100 |
| C | -2.82664900 | -0.72154700 | -0.03830200 |
| H | -3.21447800 | -1.07961300 | 0.91545800  |
| C | 0.57583900  | 0.60663700  | 0.04269800  |
| O | 0.76479000  | -0.71625600 | -0.02519600 |

|   |             |             |             |
|---|-------------|-------------|-------------|
| O | 1.48129600  | 1.41113800  | 0.10960600  |
| C | 2.13469200  | -1.15691000 | -0.01051100 |
| C | 2.12507600  | -2.66771500 | -0.04860100 |
| H | 2.61670300  | -0.77385500 | 0.89388400  |
| H | 2.64943600  | -0.72920200 | -0.87654500 |
| H | 3.15328900  | -3.03991700 | -0.04179300 |
| H | 1.60449400  | -3.07607600 | 0.82182100  |
| H | 1.63189100  | -3.03240900 | -0.95368000 |
| C | -3.45050700 | -1.26044100 | -1.29840700 |
| H | -3.32779700 | -2.34710500 | -1.34290900 |
| H | -4.52392000 | -1.04801600 | -1.31127800 |
| H | -2.99416800 | -0.82016500 | -2.18675700 |

## **R<sub>2</sub>**

|   |             |             |             |
|---|-------------|-------------|-------------|
| C | 1.71955900  | 0.67772900  | -0.45586800 |
| O | 1.96393000  | 1.84167400  | -0.66806200 |
| C | -1.79819100 | 0.26346900  | -0.10345200 |
| C | -2.21115600 | -0.56843000 | -1.15041700 |
| C | -2.71316000 | 0.75185700  | 0.82894100  |
| C | -3.55379200 | -0.90910300 | -1.24987500 |
| H | -1.48329800 | -0.93099800 | -1.86866100 |
| C | -4.05715100 | 0.40025100  | 0.72495900  |
| H | -2.35409700 | 1.40053800  | 1.62227300  |
| C | -4.47597700 | -0.42846100 | -0.31362600 |
| H | -3.88872100 | -1.54959600 | -2.05984000 |
| H | -4.77368000 | 0.77504800  | 1.44864700  |

|   |             |             |             |
|---|-------------|-------------|-------------|
| H | -5.52340900 | -0.70141700 | -0.40001700 |
| C | 2.72478500  | -0.34466300 | -0.06869100 |
| C | 2.36639500  | -1.68336800 | 0.12392300  |
| C | 4.04769200  | 0.06622400  | 0.12868500  |
| C | 3.33253800  | -2.60645300 | 0.51574200  |
| H | 1.34096500  | -2.00113200 | -0.03723200 |
| C | 5.00772900  | -0.85944700 | 0.51906900  |
| H | 4.30361100  | 1.11000200  | -0.02469600 |
| C | 4.64990100  | -2.19559400 | 0.71277700  |
| H | 3.05771600  | -3.64576800 | 0.66513600  |
| H | 6.03456500  | -0.54335400 | 0.67388300  |
| H | 5.40152500  | -2.91741700 | 1.01852300  |
| N | -0.44873200 | 0.68618900  | 0.09608400  |
| N | 0.38532500  | 0.16489400  | -0.65706100 |

**TSR<sub>1</sub>/1**

|   |             |             |             |
|---|-------------|-------------|-------------|
| C | -2.34235000 | 0.77113300  | -0.67233400 |
| H | -2.88400000 | 0.70373300  | -1.60990100 |
| C | -1.51941800 | 1.82338300  | -0.43027800 |
| C | -1.35897200 | 3.12322600  | -0.25637100 |
| H | -0.37450800 | 3.56955500  | -0.36792700 |
| C | -2.39089100 | -0.34379900 | 0.24640800  |
| O | -3.20561900 | -1.33805900 | -0.20234500 |
| O | -1.78175300 | -0.44356300 | 1.30168100  |
| C | -3.32036200 | -2.48002200 | 0.65010800  |
| C | -4.26517400 | -3.45518300 | -0.01708700 |

|   |             |             |             |
|---|-------------|-------------|-------------|
| H | -3.69391200 | -2.16252200 | 1.62924600  |
| H | -2.32832000 | -2.91891900 | 0.80020400  |
| H | -4.37667200 | -4.34831800 | 0.60500600  |
| H | -5.25246100 | -3.00617200 | -0.15689700 |
| H | -3.88275100 | -3.76203600 | -0.99493100 |
| C | -2.50467900 | 4.03793900  | 0.08364800  |
| H | -3.42271300 | 3.47123300  | 0.25186000  |
| H | -2.28022400 | 4.61678000  | 0.98630700  |
| H | -2.68373300 | 4.75424600  | -0.72601200 |
| C | 0.63186600  | 0.00335700  | -1.03214900 |
| C | 1.82833200  | -0.68264700 | -0.94752400 |
| C | 2.85227300  | -0.18777500 | -0.10256500 |
| C | 2.55767900  | 0.99585200  | 0.61846600  |
| C | 1.32690500  | 1.60213100  | 0.44977500  |
| N | 0.38604300  | 1.13125600  | -0.36964400 |
| H | -0.18917700 | -0.36496200 | -1.64829400 |
| H | 1.95482400  | -1.59327800 | -1.51865500 |
| H | 3.26565100  | 1.42781100  | 1.31388300  |
| H | 1.07096900  | 2.49999200  | 1.00882300  |
| N | 4.04850500  | -0.82073500 | 0.01927000  |
| C | 4.27668800  | -2.07666100 | -0.67340600 |
| H | 3.56664600  | -2.84913000 | -0.35221300 |
| H | 4.19041800  | -1.95192000 | -1.75892500 |
| H | 5.28469000  | -2.42530800 | -0.45224100 |
| C | 5.04915600  | -0.30665900 | 0.93715200  |



|   |            |             |            |
|---|------------|-------------|------------|
| H | 5.32367800 | 0.72347000  | 0.68371300 |
| H | 4.69639400 | -0.32981000 | 1.97608100 |
| H | 5.94602100 | -0.92075700 | 0.86574700 |

**TSR<sub>1</sub>/1'**

|   |             |             |             |
|---|-------------|-------------|-------------|
| C | 2.42322600  | 1.04420100  | -0.47969900 |
| H | 3.06073900  | 1.07466700  | -1.35651300 |
| C | 1.55589300  | 2.06192100  | -0.23384200 |
| C | 1.39100100  | 3.35427400  | -0.00093600 |
| H | 2.28738500  | 3.84077000  | 0.38411600  |
| C | 2.40330500  | -0.15633000 | 0.32351600  |
| O | 3.24479300  | -1.10855200 | -0.16659400 |
| O | 1.72366200  | -0.35715300 | 1.32042700  |
| C | 3.30096200  | -2.33216600 | 0.56997600  |
| C | 4.22415800  | -3.27033200 | -0.17627000 |
| H | 2.29178400  | -2.74715900 | 0.65949100  |
| H | 3.66704300  | -2.12798300 | 1.58215800  |
| H | 4.30014400  | -4.22149400 | 0.35904800  |
| H | 3.84343500  | -3.46909700 | -1.18224500 |
| H | 5.22661300  | -2.84231600 | -0.26433900 |
| C | 0.19821000  | 4.23481100  | -0.23132900 |
| H | -0.17138100 | 4.65857500  | 0.70939500  |
| H | 0.48288500  | 5.08076200  | -0.86676300 |
| H | -0.61399000 | 3.70043700  | -0.72483900 |
| C | -1.15963300 | 1.40234200  | 0.70282100  |
| C | -2.27424900 | 0.59924800  | 0.85167300  |

|   |             |             |             |
|---|-------------|-------------|-------------|
| C | -2.53598500 | -0.40968700 | -0.10820800 |
| C | -1.59771700 | -0.53620400 | -1.16258100 |
| C | -0.50783800 | 0.31167000  | -1.20184400 |
| N | -0.29824700 | 1.27879100  | -0.30941900 |
| H | -0.92934600 | 2.17529200  | 1.43341700  |
| H | -2.91724800 | 0.74816800  | 1.70941000  |
| H | -1.70112700 | -1.29394400 | -1.92850300 |
| H | 0.25845100  | 0.20468100  | -1.96866000 |
| N | -3.62062900 | -1.22210300 | -0.01318400 |
| C | -4.50240500 | -1.12221100 | 1.13634500  |
| H | -3.96626400 | -1.32109100 | 2.07255900  |
| H | -4.96113200 | -0.12857700 | 1.20032400  |
| H | -5.29934300 | -1.85805000 | 1.03567700  |
| C | -3.83207200 | -2.26674800 | -0.99895500 |
| H | -3.91599800 | -1.84647300 | -2.00753600 |
| H | -3.01684000 | -3.00142500 | -0.99119400 |
| H | -4.76246000 | -2.78565000 | -0.77144100 |

**TSR<sub>1</sub>/1a**

|   |             |             |             |
|---|-------------|-------------|-------------|
| C | -1.88979100 | 0.25313200  | -1.45431200 |
| H | -1.57496000 | 0.17696000  | -2.48988200 |
| C | -1.35472400 | 1.17491600  | -0.60911400 |
| C | -1.55999400 | 2.20952200  | 0.18720200  |
| H | -0.82128200 | 2.49076100  | 0.93251200  |
| C | -2.85582700 | -0.73078400 | -1.01743300 |
| O | -3.19099200 | -0.62758400 | 0.29755000  |

|   |             |             |             |
|---|-------------|-------------|-------------|
| O | -3.35974200 | -1.58648000 | -1.73396200 |
| C | -4.16423700 | -1.56114000 | 0.76940700  |
| C | -4.39292500 | -1.26839500 | 2.23667500  |
| H | -3.79563900 | -2.58079800 | 0.61471600  |
| H | -5.08614700 | -1.45020400 | 0.18870300  |
| H | -5.13066400 | -1.96488500 | 2.64597700  |
| H | -3.46364900 | -1.37689600 | 2.80320200  |
| H | -4.76555500 | -0.24941500 | 2.37577800  |
| C | -2.84674300 | 2.98756200  | 0.15707000  |
| H | -2.65405500 | 4.06464400  | 0.10698100  |
| H | -3.45999800 | 2.69713100  | -0.69855600 |
| H | -3.42373900 | 2.79910000  | 1.07000400  |
| C | 1.53372100  | 1.59776100  | 0.03317400  |
| C | 2.85048400  | 1.22433400  | 0.22012800  |
| C | 3.21719700  | -0.13541900 | 0.05182600  |
| C | 2.18161500  | -1.02501400 | -0.32813000 |
| C | 0.89734200  | -0.54152700 | -0.48658600 |
| N | 0.56967700  | 0.73578400  | -0.29979500 |
| H | 1.23334300  | 2.63749800  | 0.14629100  |
| H | 3.57825100  | 1.98113900  | 0.48318400  |
| H | 2.37063500  | -2.07788800 | -0.49222800 |
| H | 0.07390500  | -1.19200900 | -0.78231600 |
| N | 4.49179800  | -0.56009200 | 0.24017300  |
| C | 4.82703800  | -1.95813900 | 0.03178400  |
| H | 4.26886300  | -2.60887100 | 0.71586000  |

|   |            |             |             |
|---|------------|-------------|-------------|
| H | 4.61414600 | -2.26807300 | -0.99808800 |
| H | 5.89091200 | -2.10027900 | 0.21633000  |
| C | 5.51456400 | 0.37997500  | 0.66409800  |
| H | 5.68308900 | 1.15804900  | -0.09030500 |
| H | 5.24141700 | 0.86242400  | 1.61002600  |
| H | 6.45035600 | -0.15643300 | 0.81572700  |

**TSR<sub>1</sub>/1a'**

|   |             |             |             |
|---|-------------|-------------|-------------|
| C | -1.88979100 | 0.25313200  | -1.45431200 |
| H | -1.57496000 | 0.17696000  | -2.48988200 |
| C | -1.35472400 | 1.17491600  | -0.60911400 |
| C | -1.55999400 | 2.20952200  | 0.18720200  |
| H | -0.82128200 | 2.49076100  | 0.93251200  |
| C | -2.85582700 | -0.73078400 | -1.01743300 |
| O | -3.19099200 | -0.62758400 | 0.29755000  |
| O | -3.35974200 | -1.58648000 | -1.73396200 |
| C | -4.16423700 | -1.56114000 | 0.76940700  |
| C | -4.39292500 | -1.26839500 | 2.23667500  |
| H | -3.79563900 | -2.58079800 | 0.61471600  |
| H | -5.08614700 | -1.45020400 | 0.18870300  |
| H | -5.13066400 | -1.96488500 | 2.64597700  |
| H | -3.46364900 | -1.37689600 | 2.80320200  |
| H | -4.76555500 | -0.24941500 | 2.37577800  |
| C | -2.84674300 | 2.98756200  | 0.15707000  |
| H | -2.65405500 | 4.06464400  | 0.10698100  |
| H | -3.45999800 | 2.69713100  | -0.69855600 |

|          |             |             |             |
|----------|-------------|-------------|-------------|
| H        | -3.42373900 | 2.79910000  | 1.07000400  |
| C        | 1.53372100  | 1.59776100  | 0.03317400  |
| C        | 2.85048400  | 1.22433400  | 0.22012800  |
| C        | 3.21719700  | -0.13541900 | 0.05182600  |
| C        | 2.18161500  | -1.02501400 | -0.32813000 |
| C        | 0.89734200  | -0.54152700 | -0.48658600 |
| N        | 0.56967700  | 0.73578400  | -0.29979500 |
| H        | 1.23334300  | 2.63749800  | 0.14629100  |
| H        | 3.57825100  | 1.98113900  | 0.48318400  |
| H        | 2.37063500  | -2.07788800 | -0.49222800 |
| H        | 0.07390500  | -1.19200900 | -0.78231600 |
| N        | 4.49179800  | -0.56009200 | 0.24017300  |
| C        | 4.82703800  | -1.95813900 | 0.03178400  |
| H        | 4.26886300  | -2.60887100 | 0.71586000  |
| H        | 4.61414600  | -2.26807300 | -0.99808800 |
| H        | 5.89091200  | -2.10027900 | 0.21633000  |
| C        | 5.51456400  | 0.37997500  | 0.66409800  |
| H        | 5.68308900  | 1.15804900  | -0.09030500 |
| H        | 5.24141700  | 0.86242400  | 1.61002600  |
| H        | 6.45035600  | -0.15643300 | 0.81572700  |
| <b>1</b> |             |             |             |
| C        | 2.14160200  | 0.92226800  | 0.24203800  |
| H        | 3.07745400  | 1.37771100  | 0.53836500  |
| C        | 0.99288600  | 1.75835300  | 0.18043900  |
| C        | 0.92621500  | 3.11458300  | 0.20415600  |

|   |             |             |             |
|---|-------------|-------------|-------------|
| H | -0.04340200 | 3.59229100  | 0.31432700  |
| C | 2.16327400  | -0.44105600 | -0.13216700 |
| O | 3.41856800  | -0.99280300 | 0.01541500  |
| O | 1.23035900  | -1.15158700 | -0.53859000 |
| C | 3.54540200  | -2.36101600 | -0.35319300 |
| C | 4.99836200  | -2.74677000 | -0.16864500 |
| H | 3.22650200  | -2.49605700 | -1.39285000 |
| H | 2.88917500  | -2.97735100 | 0.27236000  |
| H | 5.14643500  | -3.79661500 | -0.43992200 |
| H | 5.64491300  | -2.13139700 | -0.80089400 |
| H | 5.30703000  | -2.61232900 | 0.87229400  |
| C | 2.16139200  | 3.96444300  | 0.18380800  |
| H | 2.88245900  | 3.59387100  | -0.55548000 |
| H | 1.92215400  | 5.00203900  | -0.06555700 |
| H | 2.68004300  | 3.97505600  | 1.15353500  |
| C | -0.61005100 | 0.15426600  | 1.07236900  |
| C | -1.81226300 | -0.49928500 | 1.07876600  |
| C | -2.76538200 | -0.24865600 | 0.05472700  |
| C | -2.39676600 | 0.70362100  | -0.93261100 |
| C | -1.17703100 | 1.32744900  | -0.86142100 |
| N | -0.30321900 | 1.07592400  | 0.13422700  |
| H | 0.15784300  | -0.01823400 | 1.81689800  |
| H | -1.99834500 | -1.21731200 | 1.86528600  |
| H | -3.04185500 | 0.93837600  | -1.76801000 |
| H | -0.84153800 | 2.04093300  | -1.60384500 |

|           |             |             |             |
|-----------|-------------|-------------|-------------|
| N         | -3.95098200 | -0.88696200 | 0.01856900  |
| C         | -4.25481300 | -1.91877000 | 1.00016400  |
| H         | -3.50964900 | -2.72142700 | 0.97104500  |
| H         | -4.29132500 | -1.50310700 | 2.01316100  |
| H         | -5.22898900 | -2.34729100 | 0.77035100  |
| C         | -4.89978400 | -0.60574100 | -1.04871100 |
| H         | -5.14532600 | 0.46087100  | -1.08092700 |
| H         | -4.50572900 | -0.91137200 | -2.02510300 |
| H         | -5.81811800 | -1.15840000 | -0.85753500 |
| <b>1'</b> |             |             |             |
| C         | -2.16220500 | 1.20100800  | 0.22389900  |
| H         | -3.05170700 | 1.74959800  | 0.50581800  |
| C         | -0.94123700 | 1.93421900  | 0.13229500  |
| C         | -0.75617700 | 3.27779100  | 0.08467500  |
| H         | -1.66279600 | 3.86987500  | -0.01299000 |
| C         | -2.30783900 | -0.15209800 | -0.14440300 |
| O         | -3.60932900 | -0.58976700 | 0.01649800  |
| O         | -1.44698900 | -0.95029600 | -0.55298400 |
| C         | -3.85081200 | -1.95068100 | -0.31611600 |
| C         | -5.32391700 | -2.21975300 | -0.08701900 |
| H         | -3.22804500 | -2.60194400 | 0.30817300  |
| H         | -3.56990800 | -2.13484100 | -1.35950500 |
| H         | -5.55765800 | -3.26261800 | -0.32345500 |
| H         | -5.59397300 | -2.03227300 | 0.95652000  |
| H         | -5.93933900 | -1.57551500 | -0.72165000 |

|           |             |             |             |
|-----------|-------------|-------------|-------------|
| C         | 0.53375500  | 4.03285600  | 0.24349100  |
| H         | 0.85943900  | 4.51306100  | -0.68950500 |
| H         | 0.42012200  | 4.83687000  | 0.98027500  |
| H         | 1.35469500  | 3.39615900  | 0.58876100  |
| C         | 1.13838500  | 1.17930100  | -0.90165700 |
| C         | 2.25032900  | 0.38126000  | -0.97157600 |
| C         | 2.51239400  | -0.56182200 | 0.05856000  |
| C         | 1.58385000  | -0.60133200 | 1.13290600  |
| C         | 0.48631300  | 0.21695600  | 1.11950400  |
| N         | 0.27482700  | 1.11203400  | 0.13181200  |
| H         | 0.88408700  | 1.89264400  | -1.67676500 |
| H         | 2.89421600  | 0.47457900  | -1.83515300 |
| H         | 1.69466500  | -1.29272700 | 1.95677600  |
| H         | -0.27474800 | 0.19314100  | 1.89126000  |
| N         | 3.58125900  | -1.38003000 | 0.01395000  |
| C         | 4.47705800  | -1.34601700 | -1.13284700 |
| H         | 3.94664600  | -1.60132000 | -2.05729200 |
| H         | 4.93385700  | -0.35698700 | -1.24548800 |
| H         | 5.27289300  | -2.07286000 | -0.98074200 |
| C         | 3.78333200  | -2.37357000 | 1.05896200  |
| H         | 3.90322000  | -1.89596700 | 2.03713400  |
| H         | 2.94287500  | -3.07552800 | 1.10442800  |
| H         | 4.69002300  | -2.93557400 | 0.84090800  |
| <b>1a</b> |             |             |             |
| C         | -1.53585000 | -0.32593500 | -1.13409600 |



|   |             |             |             |
|---|-------------|-------------|-------------|
| H | -0.99009000 | -0.79847500 | -1.94464800 |
| C | -0.87138400 | 0.66256100  | -0.35661100 |
| C | -1.29060600 | 1.79700900  | 0.25846500  |
| H | -0.61486100 | 2.28584800  | 0.95792100  |
| C | -2.84798000 | -0.82227000 | -0.93076500 |
| O | -3.46348300 | -0.35375800 | 0.21051000  |
| O | -3.43463000 | -1.64309100 | -1.64540100 |
| C | -4.76249400 | -0.87587700 | 0.46653700  |
| C | -5.25548600 | -0.26226400 | 1.76070100  |
| H | -4.71388100 | -1.96821300 | 0.53866000  |
| H | -5.42936600 | -0.63487200 | -0.36889300 |
| H | -6.24241900 | -0.66274000 | 2.01282600  |
| H | -4.57069800 | -0.48912300 | 2.58343100  |
| H | -5.34027700 | 0.82500200  | 1.67263700  |
| C | -2.64386400 | 2.39980500  | 0.05554900  |
| H | -2.58596000 | 3.49396200  | 0.08610000  |
| H | -3.05479100 | 2.09295500  | -0.91274400 |
| H | -3.36414400 | 2.07619100  | 0.81604900  |
| C | 1.49296100  | 1.36126100  | -0.46765100 |
| C | 2.84083400  | 1.14963000  | -0.32226400 |
| C | 3.32027100  | -0.11715000 | 0.10822500  |
| C | 2.33444600  | -1.11349100 | 0.35267900  |
| C | 1.00620300  | -0.82439700 | 0.18133600  |
| N | 0.58252100  | 0.39822400  | -0.21003500 |
| H | 1.08469800  | 2.30374100  | -0.81233500 |

|   |             |              |              |
|---|-------------|--------------|--------------|
| H | 3. 51404200 | 1. 96013100  | -0. 56603300 |
| H | 2. 60200400 | -2. 10884700 | 0. 68002900  |
| H | 0. 21731000 | -1. 54837100 | 0. 35046900  |
| N | 4. 63388800 | -0. 36453400 | 0. 26323500  |
| C | 5. 08603400 | -1. 68978200 | 0. 66569300  |
| H | 4. 71544500 | -1. 94795100 | 1. 66396000  |
| H | 4. 75129800 | -2. 45167800 | -0. 04637200 |
| H | 6. 17433800 | -1. 69911900 | 0. 68928800  |
| C | 5. 61015600 | 0. 68555900  | 0. 00730700  |
| H | 5. 60124100 | 0. 98773600  | -1. 04618000 |
| H | 5. 41379300 | 1. 56368700  | 0. 63147600  |
| H | 6. 60292600 | 0. 31114000  | 0. 25045400  |

**1a'**

|   |              |              |              |
|---|--------------|--------------|--------------|
| C | 2. 91368100  | 0. 08986600  | 0. 42806200  |
| H | 3. 93866900  | -0. 03120900 | 0. 75570000  |
| C | 2. 20297300  | -1. 09768300 | 0. 07424500  |
| C | 2. 68882900  | -2. 32250000 | -0. 24821500 |
| H | 3. 76507500  | -2. 37783300 | -0. 39132100 |
| C | 2. 49586200  | 1. 42923400  | 0. 24918800  |
| O | 1. 23941100  | 1. 57059900  | -0. 33307400 |
| O | 3. 12725900  | 2. 44561100  | 0. 55590300  |
| C | 0. 75394100  | 2. 90248500  | -0. 44486200 |
| C | -0. 64334800 | 2. 82846700  | -1. 02822400 |
| H | 1. 41981700  | 3. 48904600  | -1. 08732300 |
| H | 0. 74912000  | 3. 38047100  | 0. 54137700  |

|   |             |             |             |
|---|-------------|-------------|-------------|
| H | -1.05611300 | 3.83514600  | -1.14753100 |
| H | -0.62875000 | 2.34333100  | -2.00952500 |
| H | -1.31003200 | 2.25824800  | -0.37144200 |
| C | 1.92246700  | -3.61238800 | -0.34088400 |
| H | 1.85116800  | -3.98397300 | -1.37206000 |
| H | 2.42035500  | -4.40045700 | 0.23660600  |
| H | 0.90276200  | -3.52439600 | 0.04776600  |
| C | 0.00742800  | -1.13170400 | -0.99588700 |
| C | -1.34770000 | -0.92350400 | -1.01396500 |
| C | -2.01880100 | -0.52878200 | 0.17515700  |
| C | -1.21853100 | -0.40377500 | 1.34417400  |
| C | 0.13281600  | -0.61750800 | 1.27489900  |
| N | 0.73661600  | -0.98624900 | 0.12707900  |
| H | 0.56958200  | -1.39828000 | -1.88337600 |
| H | -1.86986600 | -1.03544600 | -1.95417300 |
| H | -1.64355300 | -0.11564500 | 2.29577300  |
| H | 0.79454000  | -0.48952900 | 2.12402000  |
| N | -3.33937300 | -0.26561100 | 0.19071200  |
| C | -3.97521400 | 0.20251200  | 1.41500200  |
| H | -3.88858300 | -0.54329600 | 2.21242500  |
| H | -3.53085000 | 1.14430900  | 1.75724300  |
| H | -5.03276300 | 0.37281500  | 1.22043800  |
| C | -4.11331700 | -0.34626200 | -1.04060700 |
| H | -3.75492900 | 0.37808200  | -1.78144700 |
| H | -4.06026200 | -1.35175600 | -1.47095100 |

|   |             |             |             |
|---|-------------|-------------|-------------|
| H | -5.15598100 | -0.12703400 | -0.81786800 |
|---|-------------|-------------|-------------|

**1a-1**

|   |             |            |            |
|---|-------------|------------|------------|
| C | -2.77943300 | 0.03320100 | 0.45578800 |
|---|-------------|------------|------------|

|   |             |             |            |
|---|-------------|-------------|------------|
| H | -3.79390500 | -0.12368500 | 0.80039200 |
|---|-------------|-------------|------------|

|   |             |             |            |
|---|-------------|-------------|------------|
| C | -2.02650300 | -1.12214000 | 0.10502600 |
|---|-------------|-------------|------------|

|   |             |             |             |
|---|-------------|-------------|-------------|
| C | -2.46761200 | -2.37309600 | -0.18604600 |
|---|-------------|-------------|-------------|

|   |             |             |             |
|---|-------------|-------------|-------------|
| H | -1.74684600 | -3.18467200 | -0.24307200 |
|---|-------------|-------------|-------------|

|   |             |            |            |
|---|-------------|------------|------------|
| C | -2.41000700 | 1.39152900 | 0.28962300 |
|---|-------------|------------|------------|

|   |             |            |             |
|---|-------------|------------|-------------|
| O | -1.16366900 | 1.58108600 | -0.29206800 |
|---|-------------|------------|-------------|

|   |             |            |            |
|---|-------------|------------|------------|
| O | -3.07933800 | 2.37864200 | 0.60522000 |
|---|-------------|------------|------------|

|   |             |            |             |
|---|-------------|------------|-------------|
| C | -0.75319100 | 2.93384300 | -0.45469400 |
|---|-------------|------------|-------------|

|   |            |            |             |
|---|------------|------------|-------------|
| C | 0.65050400 | 2.91270000 | -1.02459300 |
|---|------------|------------|-------------|

|   |             |            |            |
|---|-------------|------------|------------|
| H | -0.78590100 | 3.45148200 | 0.51020900 |
|---|-------------|------------|------------|

|   |             |            |             |
|---|-------------|------------|-------------|
| H | -1.44665500 | 3.45171300 | -1.12674700 |
|---|-------------|------------|-------------|

|   |            |            |             |
|---|------------|------------|-------------|
| H | 1.00677600 | 3.93440400 | -1.18930800 |
|---|------------|------------|-------------|

|   |            |            |             |
|---|------------|------------|-------------|
| H | 1.34115000 | 2.41449400 | -0.33554300 |
|---|------------|------------|-------------|

|   |            |            |             |
|---|------------|------------|-------------|
| H | 0.67301000 | 2.38050900 | -1.98077900 |
|---|------------|------------|-------------|

|   |             |             |             |
|---|-------------|-------------|-------------|
| C | -3.92695000 | -2.68620800 | -0.32690700 |
|---|-------------|-------------|-------------|

|   |             |             |            |
|---|-------------|-------------|------------|
| H | -4.42679500 | -2.81084000 | 0.64439800 |
|---|-------------|-------------|------------|

|   |             |             |             |
|---|-------------|-------------|-------------|
| H | -4.45053000 | -1.87750400 | -0.85089400 |
|---|-------------|-------------|-------------|

|   |             |             |             |
|---|-------------|-------------|-------------|
| H | -4.07882100 | -3.61295200 | -0.88821500 |
|---|-------------|-------------|-------------|

|   |            |             |            |
|---|------------|-------------|------------|
| C | 0.05666100 | -0.54303400 | 1.23522800 |
|---|------------|-------------|------------|

|   |            |             |            |
|---|------------|-------------|------------|
| C | 1.41409200 | -0.37255300 | 1.28915800 |
|---|------------|-------------|------------|

|   |            |             |            |
|---|------------|-------------|------------|
| C | 2.21061000 | -0.62494600 | 0.13779400 |
|---|------------|-------------|------------|

|   |            |             |             |
|---|------------|-------------|-------------|
| C | 1.52015900 | -1.05921000 | -1.02481500 |
|---|------------|-------------|-------------|

|   |             |             |             |
|---|-------------|-------------|-------------|
| C | 0.15703400  | -1.21736900 | -0.99369300 |
| N | -0.56387600 | -0.97939800 | 0.11893200  |
| H | -0.59634100 | -0.33554400 | 2.07539200  |
| H | 1.84997000  | -0.03170000 | 2.21832600  |
| H | 2.03582000  | -1.25506800 | -1.95476800 |
| H | -0.41544900 | -1.52151000 | -1.86143800 |
| N | 3.54529900  | -0.44569400 | 0.14783100  |
| C | 4.32452900  | -0.70085300 | -1.05526000 |
| H | 4.23553500  | -1.74685300 | -1.36964200 |
| H | 4.00154200  | -0.05322600 | -1.87778000 |
| H | 5.37275200  | -0.49326800 | -0.84776200 |
| C | 4.21407500  | -0.00684200 | 1.36499000  |
| H | 3.84447400  | 0.97233100  | 1.68887300  |
| H | 4.06882400  | -0.72865200 | 2.17651200  |
| H | 5.28168300  | 0.07821800  | 1.16968800  |

**TS1/1a-1**

|   |            |             |             |
|---|------------|-------------|-------------|
| C | 2.38992000 | -0.70668800 | 0.83302200  |
| H | 3.41978100 | -1.00269700 | 0.99672300  |
| C | 1.54712500 | -1.55716400 | 0.11290100  |
| C | 1.77032200 | -2.75562100 | -0.51692100 |
| H | 0.92152200 | -3.38274100 | -0.77445900 |
| C | 2.09202000 | 0.73928900  | 0.94651800  |
| O | 2.43094900 | 1.44895600  | -0.16259400 |
| O | 1.58888300 | 1.31257800  | 1.89748900  |
| C | 2.17654700 | 2.85950400  | -0.11989200 |

|   |             |             |             |
|---|-------------|-------------|-------------|
| C | 2.62926800  | 3.44638600  | -1.43874400 |
| H | 2.71784700  | 3.29588700  | 0.72593700  |
| H | 1.10703100  | 3.02426000  | 0.05134100  |
| H | 2.44957000  | 4.52565400  | -1.44706100 |
| H | 3.69736100  | 3.27213600  | -1.59511300 |
| H | 2.08161200  | 2.99782000  | -2.27259600 |
| C | 3.15953400  | -3.30836500 | -0.62200000 |
| H | 3.54513400  | -3.70319100 | 0.33217400  |
| H | 3.20953600  | -4.12530800 | -1.34901400 |
| H | 3.86761000  | -2.53105200 | -0.94350300 |
| C | -0.45884800 | -0.90181400 | -1.13743300 |
| C | -1.75810000 | -0.46860300 | -1.22940000 |
| C | -2.50283700 | -0.20003900 | -0.04897400 |
| C | -1.82996300 | -0.40610400 | 1.18634200  |
| C | -0.52900500 | -0.83733400 | 1.19714000  |
| N | 0.14740000  | -1.08928200 | 0.05383200  |
| H | 0.15719400  | -1.11170200 | -2.00380800 |
| H | -2.18105600 | -0.32451000 | -2.21418500 |
| H | -2.31744600 | -0.23287400 | 2.13588400  |
| H | 0.03589100  | -0.99893400 | 2.10815400  |
| N | -3.77886700 | 0.22871600  | -0.09818800 |
| C | -4.44010200 | 0.40741000  | -1.38290500 |
| H | -3.95470400 | 1.19208000  | -1.97439700 |
| H | -4.43779700 | -0.52469900 | -1.95802000 |
| H | -5.47504700 | 0.69716600  | -1.20924400 |

|   |             |             |            |
|---|-------------|-------------|------------|
| C | -4.49682000 | 0.52815400  | 1.13293600 |
| H | -4.60745200 | -0.36760500 | 1.75431200 |
| H | -3.97976800 | 1.30096300  | 1.71164400 |
| H | -5.48957400 | 0.89696700  | 0.88102200 |

**TS1'/1a'**

|   |             |             |             |
|---|-------------|-------------|-------------|
| C | -2.74418300 | 0.62215400  | -0.33806000 |
| H | -3.78193700 | 0.91668300  | -0.46194900 |
| C | -1.78905000 | 1.64717300  | -0.24805100 |
| C | -1.88308900 | 3.01317000  | -0.24392600 |
| H | -2.88400000 | 3.41506700  | -0.11178100 |
| C | -2.53144300 | -0.61039200 | 0.46245300  |
| O | -2.15123400 | -1.68106000 | -0.28661100 |
| O | -2.65097600 | -0.73477700 | 1.66903700  |
| C | -1.90429100 | -2.89744500 | 0.42759300  |
| C | -1.48551400 | -3.94311700 | -0.58230800 |
| H | -2.81317400 | -3.19154400 | 0.96265900  |
| H | -1.12361700 | -2.72118900 | 1.17615600  |
| H | -1.28672000 | -4.89262200 | -0.07646000 |
| H | -2.27282600 | -4.10517500 | -1.32365000 |
| H | -0.57638900 | -3.63433200 | -1.10728600 |
| C | -0.79594300 | 3.98780000  | -0.61370300 |
| H | -1.08870900 | 4.61559000  | -1.46664900 |
| H | -0.54495900 | 4.67854900  | 0.20357200  |
| H | 0.13294200  | 3.48447700  | -0.90539300 |
| C | 0.05686300  | 0.28031900  | -1.13252700 |

|   |              |              |              |
|---|--------------|--------------|--------------|
| C | 1. 32768200  | -0. 23606800 | -1. 09051300 |
| C | 2. 19275100  | 0. 08758500  | -0. 00965300 |
| C | 1. 66621100  | 0. 95420300  | 0. 98760800  |
| C | 0. 38831400  | 1. 43781100  | 0. 86854900  |
| N | -0. 40357000 | 1. 11254600  | -0. 17472400 |
| H | -0. 65545300 | 0. 05396400  | -1. 91779400 |
| H | 1. 64213300  | -0. 88650200 | -1. 89520600 |
| H | 2. 24305700  | 1. 23799300  | 1. 85710400  |
| H | -0. 06394600 | 2. 09876800  | 1. 59945300  |
| N | 3. 44394900  | -0. 40440800 | 0. 06864600  |
| C | 3. 94116800  | -1. 30352400 | -0. 96296900 |
| H | 3. 34358700  | -2. 22084900 | -1. 01085600 |
| H | 3. 93115500  | -0. 81984700 | -1. 94583700 |
| H | 4. 96858100  | -1. 57536600 | -0. 72732800 |
| C | 4. 29316000  | -0. 06386300 | 1. 20139200  |
| H | 4. 44870400  | 1. 01865400  | 1. 26446500  |
| H | 3. 85753400  | -0. 41669800 | 2. 14285100  |
| H | 5. 26325100  | -0. 54073000 | 1. 07175300  |

**TSR<sub>2</sub>/1b**

|   |              |              |              |
|---|--------------|--------------|--------------|
| C | 0. 97490500  | -0. 79162700 | -0. 71033000 |
| O | 0. 49290000  | 0. 30319300  | -1. 00983000 |
| C | -1. 68196100 | -3. 10070600 | -0. 99417200 |
| C | -1. 03090500 | -4. 33294800 | -1. 03942300 |
| C | -3. 07631600 | -3. 04171500 | -0. 94849300 |
| C | -1. 78582500 | -5. 50663700 | -1. 05064400 |



|   |             |             |             |
|---|-------------|-------------|-------------|
| H | 0.05276300  | -4.35728300 | -1.04462200 |
| C | -3.82246200 | -4.21473900 | -0.96503800 |
| H | -3.56013800 | -2.07028700 | -0.89356900 |
| C | -3.17759000 | -5.45264500 | -1.01743800 |
| H | -1.28032600 | -6.46757200 | -1.07963400 |
| H | -4.90644900 | -4.16578800 | -0.92647200 |
| H | -3.75904600 | -6.36960200 | -1.02155700 |
| C | 2.40824200  | -0.90351600 | -0.26491500 |
| C | 2.94651600  | -2.10852100 | 0.19914800  |
| C | 3.20666100  | 0.24352900  | -0.28330800 |
| C | 4.26723600  | -2.16226500 | 0.63866100  |
| H | 2.32084200  | -2.99456200 | 0.21452100  |
| C | 4.52889300  | 0.18810600  | 0.15024800  |
| H | 2.77049600  | 1.17208400  | -0.63862800 |
| C | 5.06165100  | -1.01535700 | 0.61367100  |
| H | 4.67716200  | -3.09957900 | 1.00341100  |
| H | 5.14324100  | 1.08352000  | 0.13213300  |
| H | 6.09173600  | -1.05926600 | 0.95547000  |
| N | -0.98014900 | -1.83457100 | -0.94410900 |
| N | 0.32313000  | -1.99598400 | -0.80428300 |
| C | -0.67679500 | -1.82861900 | -3.64714800 |
| C | -0.75714100 | -1.30180300 | -4.91840000 |
| C | -1.49908100 | -0.10802200 | -5.12982200 |
| C | -2.09903500 | 0.48693000  | -3.98888600 |
| C | -1.95758200 | -0.11462800 | -2.75548200 |

|   |             |             |             |
|---|-------------|-------------|-------------|
| N | -1.28958300 | -1.25529700 | -2.61595500 |
| H | -0.10028700 | -2.72496500 | -3.41851200 |
| H | -0.24646400 | -1.80608900 | -5.72798900 |
| H | -2.64494200 | 1.41849100  | -4.05523300 |
| H | -2.35878500 | 0.31201700  | -1.84090800 |
| N | -1.61659900 | 0.44492500  | -6.36063400 |
| C | -0.95348200 | -0.16660400 | -7.50052100 |
| H | 0.13364300  | -0.19559700 | -7.36146000 |
| H | -1.31508800 | -1.18760200 | -7.66811100 |
| H | -1.16912100 | 0.42064200  | -8.39203900 |
| C | -2.35803300 | 1.68327900  | -6.53188600 |
| H | -3.39510700 | 1.57189900  | -6.19550500 |
| H | -1.89424700 | 2.50775900  | -5.97693500 |
| H | -2.37022700 | 1.94508000  | -7.58878400 |

**TSR<sub>2</sub>/1b'**

|   |             |             |             |
|---|-------------|-------------|-------------|
| C | 1.85748000  | -2.07009100 | -1.36758100 |
| O | 2.13311100  | -0.90326300 | -1.65694300 |
| C | -1.56430500 | -2.03296100 | -0.50034700 |
| C | -1.73533800 | -3.22770000 | 0.19781900  |
| C | -2.66544200 | -1.22999600 | -0.80439900 |
| C | -3.01553700 | -3.60801500 | 0.60166400  |
| H | -0.87008500 | -3.84939500 | 0.39786500  |
| C | -3.93831900 | -1.61351500 | -0.39685400 |
| H | -2.50771800 | -0.31193800 | -1.36382000 |
| C | -4.11652000 | -2.80531700 | 0.30917200  |

|   |             |             |             |
|---|-------------|-------------|-------------|
| H | -3.15223600 | -4.54151700 | 1.13968200  |
| H | -4.79372900 | -0.99020300 | -0.63888600 |
| H | -5.11109200 | -3.10999300 | 0.62048200  |
| C | 2.88890500  | -3.15719500 | -1.51012700 |
| C | 2.59692300  | -4.50015700 | -1.24922500 |
| C | 4.16898100  | -2.80585000 | -1.94719900 |
| C | 3.57593400  | -5.47648000 | -1.42326200 |
| H | 1.60094000  | -4.77019400 | -0.91496800 |
| C | 5.14818600  | -3.78136100 | -2.11816900 |
| H | 4.37605900  | -1.76016200 | -2.15236200 |
| C | 4.85310800  | -5.11968800 | -1.85648400 |
| H | 3.34167400  | -6.51766700 | -1.22138400 |
| H | 6.14055300  | -3.49885900 | -2.45729700 |
| H | 5.61510300  | -5.88199600 | -1.99069200 |
| N | -0.27914600 | -1.57490900 | -0.98628900 |
| N | 0.66033100  | -2.49408800 | -0.84804300 |
| C | 0.31057800  | -0.56155700 | 1.47236000  |
| C | 0.74475800  | 0.40001000  | 2.35932800  |
| C | 0.93355000  | 1.73229200  | 1.90131900  |
| C | 0.66836900  | 1.98467200  | 0.52968800  |
| C | 0.24086600  | 0.95372600  | -0.28114700 |
| N | 0.04445200  | -0.26933600 | 0.20197300  |
| H | 0.17738400  | -1.60406400 | 1.76090800  |
| H | 0.94492800  | 0.11617700  | 3.38410700  |
| H | 0.81880100  | 2.96222700  | 0.09197100  |

|   |            |            |             |
|---|------------|------------|-------------|
| H | 0.06456200 | 1.07404300 | -1.34596300 |
| N | 1.36051000 | 2.71370500 | 2.73122400  |
| C | 1.64388700 | 2.41718700 | 4.12563400  |
| H | 0.75648500 | 2.02165500 | 4.63247200  |
| H | 2.45957000 | 1.69075200 | 4.22362700  |
| H | 1.94076600 | 3.33585600 | 4.62993400  |
| C | 1.58929300 | 4.05301200 | 2.21435400  |
| H | 2.34927300 | 4.05073400 | 1.42405000  |
| H | 0.66551800 | 4.48702300 | 1.81445900  |
| H | 1.94166000 | 4.68880600 | 3.02504100  |

**1b**

|   |             |             |             |
|---|-------------|-------------|-------------|
| C | 1.82278700  | -1.91857400 | -1.19916500 |
| O | 2.01608800  | -0.68138500 | -1.20417400 |
| C | -1.67521500 | -2.16586100 | -0.88644300 |
| C | -2.87697000 | -1.60152000 | -1.33794300 |
| C | -1.71363000 | -3.24585400 | 0.00520900  |
| C | -4.09507600 | -2.11113700 | -0.89380300 |
| H | -2.87016000 | -0.76134700 | -2.02531800 |
| C | -2.93968200 | -3.74036500 | 0.44002800  |
| H | -0.77940600 | -3.67592200 | 0.34393500  |
| C | -4.13840400 | -3.18254800 | -0.00431000 |
| H | -5.01688800 | -1.66278700 | -1.25308500 |
| H | -2.95395000 | -4.57692600 | 1.13268900  |
| H | -5.09019600 | -3.57490500 | 0.33896700  |
| C | 3.01650400  | -2.84905200 | -1.17825400 |

|   |             |             |             |
|---|-------------|-------------|-------------|
| C | 2.88827300  | -4.24246900 | -1.18348300 |
| C | 4.29260400  | -2.28293800 | -1.14414800 |
| C | 4.02127800  | -5.05298600 | -1.15413100 |
| H | 1.89534700  | -4.67908400 | -1.21203400 |
| C | 5.42688000  | -3.09290500 | -1.11575400 |
| H | 4.37075600  | -1.20032600 | -1.13748100 |
| C | 5.29411500  | -4.48077100 | -1.12144100 |
| H | 3.91169900  | -6.13382300 | -1.15706900 |
| H | 6.41458700  | -2.64125600 | -1.08715400 |
| H | 6.17652000  | -5.11391000 | -1.09925800 |
| N | -0.41594200 | -1.62154400 | -1.24482300 |
| N | 0.64810300  | -2.55433000 | -1.24523500 |
| C | -0.62787800 | -1.56386600 | -3.63694900 |
| C | -0.59770200 | -0.89792200 | -4.82999200 |
| C | -0.36227300 | 0.50991000  | -4.85163000 |
| C | -0.18112200 | 1.15135000  | -3.59558100 |
| C | -0.21722800 | 0.41852200  | -2.43699800 |
| N | -0.46262700 | -0.90450600 | -2.46819900 |
| H | -0.77494000 | -2.63480300 | -3.54826700 |
| H | -0.74257100 | -1.46488500 | -5.73927400 |
| H | 0.02198700  | 2.21042300  | -3.52275900 |
| H | -0.04633200 | 0.82577200  | -1.44924100 |
| N | -0.30311500 | 1.19326400  | -6.00707000 |
| C | -0.46554400 | 0.50180700  | -7.27957700 |
| H | 0.30828900  | -0.26157300 | -7.41492300 |

|   |             |            |             |
|---|-------------|------------|-------------|
| H | -1.45098400 | 0.02910400 | -7.34838400 |
| H | -0.37756600 | 1.22721500 | -8.08625100 |
| C | -0.02966900 | 2.62478600 | -5.99498400 |
| H | -0.80665900 | 3.16790800 | -5.44636000 |
| H | 0.94357900  | 2.83489800 | -5.53840400 |
| H | -0.01511900 | 2.98914600 | -7.02046900 |

**1b'**

|   |             |             |             |
|---|-------------|-------------|-------------|
| C | 1.80138900  | -2.10345400 | -1.25162700 |
| O | 1.99060400  | -0.98074700 | -1.77191200 |
| C | -1.58593200 | -1.94713800 | -0.31599900 |
| C | -1.93604300 | -3.27253600 | -0.60273100 |
| C | -2.56519500 | -1.06254400 | 0.16031600  |
| C | -3.25003600 | -3.69496300 | -0.41772700 |
| H | -1.17135500 | -3.94625600 | -0.96825900 |
| C | -3.87299900 | -1.50279800 | 0.34107400  |
| H | -2.31508800 | -0.02964700 | 0.38291100  |
| C | -4.22777600 | -2.82028000 | 0.05431100  |
| H | -3.50760100 | -4.72527500 | -0.64594400 |
| H | -4.61870400 | -0.80450800 | 0.70988400  |
| H | -5.24921500 | -3.15851400 | 0.19580400  |
| C | 2.89794600  | -3.14351000 | -1.32539700 |
| C | 2.79295800  | -4.39423400 | -0.70634200 |
| C | 4.05221800  | -2.83730600 | -2.04983000 |
| C | 3.82716300  | -5.32129500 | -0.81501600 |
| H | 1.89565200  | -4.62817600 | -0.14312400 |

|   |             |             |             |
|---|-------------|-------------|-------------|
| C | 5.08643600  | -3.76520100 | -2.16130100 |
| H | 4.11604300  | -1.86246600 | -2.52314200 |
| C | 4.97727500  | -5.01014400 | -1.54252900 |
| H | 3.73637200  | -6.29002700 | -0.33158400 |
| H | 5.97715600  | -3.51711400 | -2.73157000 |
| H | 5.78128700  | -5.73563800 | -1.62791700 |
| N | -0.26919100 | -1.49991000 | -0.59410100 |
| N | 0.71597200  | -2.51349500 | -0.58664400 |
| C | 0.32527200  | -0.60365600 | 1.55406400  |
| C | 0.74004000  | 0.42294400  | 2.35510700  |
| C | 0.97336100  | 1.71369700  | 1.79189100  |
| C | 0.75994800  | 1.85383300  | 0.39304600  |
| C | 0.35114100  | 0.77712000  | -0.35167300 |
| N | 0.11215100  | -0.41140700 | 0.23293200  |
| H | 0.14865600  | -1.61229700 | 1.91173300  |
| H | 0.89365300  | 0.22448900  | 3.40678600  |
| H | 0.93880900  | 2.78896700  | -0.11869200 |
| H | 0.20129400  | 0.79297100  | -1.42300900 |
| N | 1.38145700  | 2.74455200  | 2.55149500  |
| C | 1.60259200  | 2.56033100  | 3.98015800  |
| H | 0.68263400  | 2.24180800  | 4.48206900  |
| H | 2.38630600  | 1.81781800  | 4.16492200  |
| H | 1.91919200  | 3.50727000  | 4.41327800  |
| C | 1.61908200  | 4.04844500  | 1.94586800  |
| H | 2.40140500  | 3.99057600  | 1.18149100  |

|   |            |            |            |
|---|------------|------------|------------|
| H | 0.70353700 | 4.44205300 | 1.49088600 |
| H | 1.94481500 | 4.74310800 | 2.71794000 |

**$\gamma$ -TS1/2(R)**

|   |             |             |             |
|---|-------------|-------------|-------------|
| C | 0.42817300  | -0.67511100 | 1.54666600  |
| H | 1.36502100  | -0.46025500 | 2.04381700  |
| C | -0.44819100 | 0.36398000  | 1.34942400  |
| C | -0.08996000 | 1.71404300  | 1.51332300  |
| H | -0.89510600 | 2.44114900  | 1.45349900  |
| C | 0.22390400  | -2.06218400 | 1.13857100  |
| O | 1.29381700  | -2.81531600 | 1.46790700  |
| O | -0.75630800 | -2.53102200 | 0.58300400  |
| C | 1.23012600  | -4.19677100 | 1.09255500  |
| C | 2.50788200  | -4.85333000 | 1.56377900  |
| H | 1.11765100  | -4.26202600 | 0.00585700  |
| H | 0.34592200  | -4.65038400 | 1.55353400  |
| H | 2.50406700  | -5.91081800 | 1.28303800  |
| H | 3.37727000  | -4.37528100 | 1.10431400  |
| H | 2.60440900  | -4.78499300 | 2.65129100  |
| C | 1.10484900  | 2.05801200  | 2.35111400  |
| H | 2.02690400  | 1.69578100  | 1.87300000  |
| H | 1.19135500  | 3.13857300  | 2.48432500  |
| H | 1.04162600  | 1.59536400  | 3.34416100  |
| C | -2.63561300 | -0.69213500 | 1.44433800  |
| C | -3.90408300 | -0.91003600 | 0.98387100  |
| C | -4.34083700 | -0.28535800 | -0.21820600 |



|   |             |             |             |
|---|-------------|-------------|-------------|
| C | -3.40696100 | 0.56739700  | -0.86424500 |
| C | -2.15144100 | 0.74448600  | -0.34476500 |
| N | -1.76969400 | 0.12109800  | 0.79673000  |
| H | -2.26276100 | -1.15069300 | 2.35178400  |
| H | -4.54478200 | -1.57076200 | 1.55111100  |
| H | -3.64636600 | 1.07728600  | -1.78706100 |
| H | -1.38171000 | 1.34548400  | -0.81984100 |
| N | -5.57514900 | -0.48901700 | -0.71293600 |
| C | -6.49640300 | -1.38933300 | -0.03353100 |
| H | -6.08399300 | -2.40231100 | 0.02870100  |
| H | -6.72106200 | -1.03277200 | 0.97781600  |
| H | -7.42815100 | -1.43205500 | -0.59480500 |
| C | -5.97297700 | 0.14847400  | -1.96121800 |
| H | -5.91734700 | 1.23917600  | -1.87976800 |
| H | -5.33756500 | -0.17893300 | -2.79139600 |
| H | -7.00253800 | -0.12443300 | -2.18622000 |
| C | 1.23502100  | -0.05661100 | -1.16477500 |
| N | 0.72727100  | 1.99901200  | -0.44718700 |
| N | 1.67920600  | 1.10339200  | -0.54730100 |
| O | 0.12405900  | -0.22971800 | -1.67013600 |
| C | 2.28520200  | -1.13201700 | -1.26390800 |
| C | 1.96803400  | -2.29756200 | -1.96583600 |
| C | 3.54646500  | -1.01014400 | -0.66912000 |
| C | 2.90170200  | -3.32595000 | -2.08485800 |
| H | 0.98018100  | -2.37899700 | -2.40918600 |

|   |             |             |             |
|---|-------------|-------------|-------------|
| C | 4.47858500  | -2.03762700 | -0.78745000 |
| H | 3.78215200  | -0.10892900 | -0.11334900 |
| C | 4.15991500  | -3.19754300 | -1.49684000 |
| H | 2.64761900  | -4.22709200 | -2.63607800 |
| H | 5.45536100  | -1.93602100 | -0.32311600 |
| H | 4.88961100  | -3.99734600 | -1.58841200 |
| C | 1.22229800  | 3.31801500  | -0.23998600 |
| C | 0.27261700  | 4.34645900  | -0.15581700 |
| C | 2.58431600  | 3.63701600  | -0.17932800 |
| C | 0.67292900  | 5.66524700  | 0.01649400  |
| H | -0.78173800 | 4.09274000  | -0.23204400 |
| C | 2.97926400  | 4.96363100  | -0.01157800 |
| H | 3.31414900  | 2.84189200  | -0.28027300 |
| C | 2.03247700  | 5.98111000  | 0.09570400  |
| H | -0.07385800 | 6.45139700  | 0.08146300  |
| H | 4.03811400  | 5.20336000  | 0.03113100  |
| H | 2.34782400  | 7.01199500  | 0.22507600  |

**$\gamma$ -2(R)**

|   |             |             |             |
|---|-------------|-------------|-------------|
| C | 0.49834400  | 1.94206900  | -1.42914600 |
| H | 1.41417500  | 1.95256000  | -2.00945200 |
| C | -0.25684400 | 0.84250900  | -1.43468500 |
| C | 0.06032400  | -0.46533100 | -2.13673200 |
| H | -0.86969600 | -0.80618300 | -2.60292400 |
| C | 0.20361400  | 3.16377500  | -0.63531600 |
| O | 1.26228300  | 3.97797400  | -0.63440000 |

|   |             |             |             |
|---|-------------|-------------|-------------|
| O | -0.83993100 | 3.41707600  | -0.07059400 |
| C | 1.12882700  | 5.19860500  | 0.11926800  |
| C | 2.43795800  | 5.94380200  | 0.00276000  |
| H | 0.89271400  | 4.94262200  | 1.15614700  |
| H | 0.29125700  | 5.77065500  | -0.29171300 |
| H | 2.37481600  | 6.88314200  | 0.55898600  |
| H | 3.25941800  | 5.35236400  | 0.41518300  |
| H | 2.66313400  | 6.17582600  | -1.04160500 |
| C | 1.10832700  | -0.34473300 | -3.23888300 |
| H | 2.06950500  | -0.00933800 | -2.84890200 |
| H | 1.25939600  | -1.33074800 | -3.68547800 |
| H | 0.75875300  | 0.34395500  | -4.01446000 |
| C | -2.62980000 | 1.25135200  | -1.17974400 |
| C | -3.81466800 | 1.16184300  | -0.50651600 |
| C | -3.85274100 | 0.56547900  | 0.78900600  |
| C | -2.61793200 | 0.09580200  | 1.30858600  |
| C | -1.46026500 | 0.21422100  | 0.58371800  |
| N | -1.47488000 | 0.78073600  | -0.65030500 |
| H | -2.55302200 | 1.70313300  | -2.16238400 |
| H | -4.70428400 | 1.55273200  | -0.98066900 |
| H | -2.54892100 | -0.36606800 | 2.28405800  |
| H | -0.48356300 | -0.14585900 | 0.93276700  |
| N | -5.00094600 | 0.45580900  | 1.47650300  |
| C | -6.23785600 | 1.00251400  | 0.93517600  |
| H | -6.12384500 | 2.06574700  | 0.69987300  |

|   |             |             |             |
|---|-------------|-------------|-------------|
| H | -6.54776200 | 0.46555400  | 0.03142300  |
| H | -7.02259800 | 0.90255400  | 1.68298600  |
| C | -5.01298500 | -0.20248200 | 2.77741500  |
| H | -4.60618300 | -1.21574100 | 2.70343600  |
| H | -4.43125100 | 0.36357000  | 3.51324400  |
| H | -6.04195700 | -0.27143800 | 3.12608000  |
| C | 2.05380500  | -1.01450000 | 0.45724200  |
| N | 0.42403900  | -1.41383600 | -1.09341600 |
| N | 1.80588200  | -1.40356900 | -0.78881100 |
| O | 1.23599300  | -0.69451300 | 1.35902800  |
| C | 3.53148600  | -0.98005100 | 0.79671100  |
| C | 3.91120300  | -0.52851700 | 2.06296000  |
| C | 4.52203900  | -1.37988500 | -0.10766500 |
| C | 5.25693600  | -0.47152000 | 2.42270400  |
| H | 3.12937400  | -0.22746500 | 2.75317600  |
| C | 5.86717600  | -1.32487200 | 0.25114500  |
| H | 4.22244200  | -1.73384900 | -1.08852800 |
| C | 6.23943600  | -0.86996800 | 1.51723500  |
| H | 5.53956800  | -0.11956800 | 3.41100200  |
| H | 6.62787300  | -1.64101400 | -0.45744900 |
| H | 7.28876700  | -0.82983600 | 1.79596300  |
| C | -0.31931200 | -2.55575100 | -0.84348900 |
| C | -1.68904100 | -2.66063000 | -1.17719000 |
| C | 0.27640400  | -3.65101900 | -0.18144700 |
| C | -2.40360500 | -3.82296800 | -0.89952100 |

|   |             |             |             |
|---|-------------|-------------|-------------|
| H | -2.21865900 | -1.82989100 | -1.63309800 |
| C | -0.45515800 | -4.80005700 | 0.08993000  |
| H | 1.31878700  | -3.58186800 | 0.10407600  |
| C | -1.80003700 | -4.90937700 | -0.26951300 |
| H | -3.45416300 | -3.86828800 | -1.17575200 |
| H | 0.04008000  | -5.62622100 | 0.59315600  |
| H | -2.36339700 | -5.81118800 | -0.05326800 |

**$\gamma$ -TS2/3(RS)**

|   |             |             |             |
|---|-------------|-------------|-------------|
| C | -2.39207100 | 0.27453900  | -1.47495000 |
| H | -2.62089400 | 0.68324200  | -2.44966800 |
| C | -1.07100900 | 0.13968000  | -1.12257800 |
| C | 0.02110900  | 0.04474700  | -2.19231100 |
| H | -0.10654600 | -0.93057000 | -2.66559700 |
| C | -3.52189800 | 0.02460800  | -0.60856500 |
| O | -4.68799500 | 0.28545600  | -1.25381000 |
| O | -3.51981900 | -0.38468700 | 0.54653600  |
| C | -5.88525200 | 0.06863000  | -0.50040700 |
| C | -7.05270000 | 0.44370000  | -1.38605600 |
| H | -5.85423700 | 0.67953300  | 0.40749200  |
| H | -5.93245400 | -0.98151800 | -0.19391000 |
| H | -7.99158400 | 0.29122900  | -0.84562400 |
| H | -6.99338900 | 1.49424600  | -1.68389700 |
| H | -7.07033400 | -0.17211000 | -2.28951700 |
| C | -0.10387400 | 1.11292600  | -3.27824700 |
| H | -0.10697600 | 2.11188600  | -2.83735500 |

|   |             |             |             |
|---|-------------|-------------|-------------|
| H | 0.74807900  | 1.02391100  | -3.95827600 |
| H | -1.01912100 | 0.98060400  | -3.85981500 |
| C | -0.34495800 | -1.93690600 | -0.08244400 |
| C | -0.04315900 | -2.74362700 | 0.97823800  |
| C | -0.15962000 | -2.24428200 | 2.30594400  |
| C | -0.61853000 | -0.90752000 | 2.43701100  |
| C | -0.90957300 | -0.16181800 | 1.32631600  |
| N | -0.75577600 | -0.65620100 | 0.07611700  |
| H | -0.26363500 | -2.29945700 | -1.09961400 |
| H | 0.29056200  | -3.75112800 | 0.77113000  |
| H | -0.75833300 | -0.44468900 | 3.40397400  |
| H | -1.26092800 | 0.85751900  | 1.38401400  |
| N | 0.14661500  | -2.99999400 | 3.37408400  |
| C | 0.60987300  | -4.36954300 | 3.19369700  |
| H | -0.15164300 | -4.98251500 | 2.69905800  |
| H | 1.53081400  | -4.39656200 | 2.60203100  |
| H | 0.81745700  | -4.80468400 | 4.16977800  |
| C | -0.01308800 | -2.45970200 | 4.71781500  |
| H | 0.59773100  | -1.56080300 | 4.85243000  |
| H | -1.06098500 | -2.21328900 | 4.92165100  |
| H | 0.31345400  | -3.20576100 | 5.43992900  |
| C | 0.87475400  | 1.90758700  | -0.31046700 |
| N | 1.33353300  | 0.03348600  | -1.56333700 |
| N | 1.77016600  | 1.10710200  | -0.80385000 |
| O | -0.41975900 | 1.80569700  | -0.42421300 |

|                                  |              |              |              |
|----------------------------------|--------------|--------------|--------------|
| C                                | 1. 38829900  | 3. 06698700  | 0. 48623000  |
| C                                | 2. 76005500  | 3. 32000100  | 0. 61728900  |
| C                                | 0. 47540400  | 3. 90828000  | 1. 12879200  |
| C                                | 3. 20570000  | 4. 38735200  | 1. 38977300  |
| H                                | 3. 46540000  | 2. 67381200  | 0. 10509200  |
| C                                | 0. 92462200  | 4. 97923900  | 1. 90113300  |
| H                                | -0. 58578500 | 3. 71401000  | 1. 01006700  |
| C                                | 2. 28994800  | 5. 22074000  | 2. 03660500  |
| H                                | 4. 27141500  | 4. 57492700  | 1. 48486600  |
| H                                | 0. 20548500  | 5. 62685600  | 2. 39454200  |
| H                                | 2. 64003300  | 6. 05519100  | 2. 63725700  |
| C                                | 2. 28927800  | -0. 93835200 | -1. 83206000 |
| C                                | 2. 14735800  | -1. 88418000 | -2. 86916400 |
| C                                | 3. 44624000  | -1. 01365900 | -1. 02585100 |
| C                                | 3. 10757300  | -2. 87710100 | -3. 05877500 |
| H                                | 1. 31322900  | -1. 84014100 | -3. 56057500 |
| C                                | 4. 39536700  | -2. 00455600 | -1. 23846200 |
| H                                | 3. 57504000  | -0. 28696700 | -0. 23445400 |
| C                                | 4. 23726700  | -2. 95593800 | -2. 24861200 |
| H                                | 2. 96942100  | -3. 58777500 | -3. 86898400 |
| H                                | 5. 27210400  | -2. 03448300 | -0. 59716300 |
| H                                | 4. 98276200  | -3. 72799200 | -2. 40743200 |
| <b><math>\gamma</math>-3(RS)</b> |              |              |              |
| C                                | -1. 94261400 | -0. 13126100 | -1. 90571000 |
| H                                | -1. 94133200 | -0. 23210900 | -2. 98097400 |

|   |             |             |             |
|---|-------------|-------------|-------------|
| C | -0.70717800 | 0.19747300  | -1.21672600 |
| C | 0.55141400  | 0.17506900  | -2.11577800 |
| H | 0.64894200  | -0.81596400 | -2.55843600 |
| C | -3.13357300 | -0.22826400 | -1.17428800 |
| O | -4.23047000 | -0.52412100 | -1.95683900 |
| O | -3.27516500 | -0.09299500 | 0.05479400  |
| C | -5.47231600 | -0.62176200 | -1.26979500 |
| C | -6.53799700 | -0.94150700 | -2.29740000 |
| H | -5.68722500 | 0.32232400  | -0.75619500 |
| H | -5.41245200 | -1.40302100 | -0.50354100 |
| H | -7.51507000 | -1.02707100 | -1.81175800 |
| H | -6.59616800 | -0.15369800 | -3.05412000 |
| H | -6.32029800 | -1.88742700 | -2.80233300 |
| C | 0.47347400  | 1.22221200  | -3.22731500 |
| H | 0.33581300  | 2.22198700  | -2.80743000 |
| H | 1.40703800  | 1.21251000  | -3.79731200 |
| H | -0.35605800 | 1.01765000  | -3.90618200 |
| C | -0.04768500 | -2.03030500 | -0.27872400 |
| C | 0.13377900  | -2.96031300 | 0.70780200  |
| C | -0.13674200 | -2.61883600 | 2.06277400  |
| C | -0.61957300 | -1.30739100 | 2.29115200  |
| C | -0.77143100 | -0.43185400 | 1.24294600  |
| N | -0.45755700 | -0.76996600 | -0.02342500 |
| H | 0.11449700  | -2.28472800 | -1.31841800 |
| H | 0.47119400  | -3.94741600 | 0.42303900  |



|   |             |             |             |
|---|-------------|-------------|-------------|
| H | -0.89693900 | -0.96523500 | 3.27840800  |
| H | -1.17038300 | 0.56136200  | 1.38968400  |
| N | 0.04669800  | -3.49928500 | 3.06504000  |
| C | 0.53732000  | -4.84010800 | 2.78105100  |
| H | -0.17271400 | -5.40393600 | 2.16492200  |
| H | 1.50313100  | -4.80127100 | 2.26657200  |
| H | 0.67421300  | -5.37117300 | 3.72165300  |
| C | -0.29801400 | -3.12908000 | 4.43048900  |
| H | 0.28486100  | -2.26259500 | 4.76098000  |
| H | -1.36473900 | -2.89464400 | 4.51983700  |
| H | -0.07237500 | -3.96557300 | 5.08971100  |
| C | 0.46545700  | 1.92396200  | -0.07813000 |
| N | 1.69314100  | 0.40392400  | -1.24494100 |
| N | 1.61433100  | 1.41569400  | -0.33556200 |
| O | -0.72129100 | 1.49563400  | -0.59062500 |
| C | 0.33392600  | 3.05573700  | 0.86275100  |
| C | 1.47332400  | 3.68006400  | 1.38764500  |
| C | -0.93705800 | 3.49747300  | 1.24782900  |
| C | 1.33879400  | 4.72595100  | 2.29256400  |
| H | 2.45514400  | 3.34104700  | 1.07356500  |
| C | -1.06371100 | 4.55074700  | 2.15262200  |
| H | -1.81942400 | 3.01783300  | 0.83570400  |
| C | 0.06993500  | 5.16470000  | 2.67948000  |
| H | 2.22610700  | 5.20489100  | 2.69555900  |
| H | -2.05313700 | 4.88829900  | 2.44557400  |

|   |             |             |             |
|---|-------------|-------------|-------------|
| H | -0.03106500 | 5.98351600  | 3.38537000  |
| C | 2.94317200  | -0.18730500 | -1.43001500 |
| C | 3.22102200  | -0.96496400 | -2.56702200 |
| C | 3.94823400  | -0.02554300 | -0.45872800 |
| C | 4.46441200  | -1.57816100 | -2.71001000 |
| H | 2.48681900  | -1.07779400 | -3.35668800 |
| C | 5.18496600  | -0.63595800 | -0.62528100 |
| H | 3.74053500  | 0.57442500  | 0.41867900  |
| C | 5.45734900  | -1.42198500 | -1.74635800 |
| H | 4.65747300  | -2.17094900 | -3.59956400 |
| H | 5.94518300  | -0.49813400 | 0.13832700  |
| H | 6.42542500  | -1.89655600 | -1.86799300 |

**$\gamma$ -TS3/P(RS)**

|   |             |             |             |
|---|-------------|-------------|-------------|
| C | 1.72691100  | -0.22256300 | -2.01583000 |
| H | 1.59372600  | 0.14441000  | -3.02504600 |
| C | 0.57668000  | -0.48299700 | -1.24238200 |
| C | -0.74413800 | -0.64801900 | -1.99782200 |
| H | -0.89910400 | 0.24301300  | -2.61152500 |
| C | 3.03504200  | -0.29891100 | -1.47166900 |
| O | 3.99921500  | -0.04623700 | -2.41447000 |
| O | 3.36091900  | -0.54807400 | -0.30680300 |
| C | 5.34762600  | -0.10174900 | -1.95384600 |
| C | 6.24769600  | 0.15241200  | -3.14429900 |
| H | 5.54180000  | -1.08320200 | -1.50851800 |
| H | 5.49858800  | 0.65057300  | -1.17149700 |

|   |             |             |             |
|---|-------------|-------------|-------------|
| H | 6.04676500  | 1.13410000  | -3.58309900 |
| H | 7.29629500  | 0.12260900  | -2.83267800 |
| H | 6.09538000  | -0.60812800 | -3.91548300 |
| C | -0.70344300 | -1.89333700 | -2.88874000 |
| H | -0.45764900 | -2.77700200 | -2.29264900 |
| H | -1.68379200 | -2.04815700 | -3.34865100 |
| H | 0.04869000  | -1.78802600 | -3.67241300 |
| C | -0.52396400 | 1.93316000  | -0.43830200 |
| C | -0.55346600 | 3.09263400  | 0.30382900  |
| C | 0.25647400  | 3.20438400  | 1.46355500  |
| C | 1.05801300  | 2.07949600  | 1.78029400  |
| C | 1.02569400  | 0.96314900  | 0.97367100  |
| N | 0.24321300  | 0.88160300  | -0.11636500 |
| H | -1.14651200 | 1.83863500  | -1.32236100 |
| H | -1.20691400 | 3.89354200  | -0.01529300 |
| H | 1.71034700  | 2.07010100  | 2.64314300  |
| H | 1.65481400  | 0.10084300  | 1.16945800  |
| N | 0.26119100  | 4.32318900  | 2.22469000  |
| C | -0.56792600 | 5.45873700  | 1.85552100  |
| H | -0.28867600 | 5.85202800  | 0.87098200  |
| H | -1.62961600 | 5.18694700  | 1.83896100  |
| H | -0.43157000 | 6.25042800  | 2.59091800  |
| C | 1.11311700  | 4.39646700  | 3.40058700  |
| H | 0.84955100  | 3.62217800  | 4.13029200  |
| H | 2.17028400  | 4.28289200  | 3.13352100  |

|   |             |             |             |
|---|-------------|-------------|-------------|
| H | 0.98201300  | 5.36913300  | 3.87221100  |
| C | -0.40403100 | -1.77457600 | 0.44162200  |
| N | -1.81397700 | -0.73260800 | -1.01467300 |
| N | -1.59587600 | -1.42294300 | 0.13757400  |
| O | 0.71245700  | -1.48845800 | -0.28890800 |
| C | -0.10999200 | -2.54038100 | 1.66794400  |
| C | 1.22078300  | -2.76967000 | 2.03729000  |
| C | -1.14965800 | -3.02588700 | 2.47110600  |
| C | 1.50344600  | -3.47768600 | 3.20467000  |
| H | 2.02372900  | -2.39226200 | 1.40983300  |
| C | -0.85835400 | -3.72621600 | 3.63556400  |
| H | -2.17807000 | -2.85165100 | 2.17091700  |
| C | 0.46911100  | -3.95452500 | 4.00658800  |
| H | 2.53734100  | -3.65463300 | 3.48529600  |
| H | -1.66810300 | -4.10007100 | 4.25495000  |
| H | 0.69308800  | -4.50585900 | 4.91487200  |
| C | -3.13048400 | -0.36057500 | -1.29110700 |
| C | -3.49530700 | 0.12275800  | -2.55989600 |
| C | -4.11684100 | -0.44472800 | -0.29109900 |
| C | -4.80820600 | 0.51949500  | -2.80813800 |
| H | -2.77540200 | 0.17096400  | -3.36895300 |
| C | -5.42118800 | -0.05173600 | -0.56191700 |
| H | -3.84340400 | -0.81271200 | 0.68959800  |
| C | -5.78350300 | 0.43616500  | -1.81875200 |
| H | -5.06609000 | 0.88360900  | -3.79851600 |

|                                 |             |             |             |
|---------------------------------|-------------|-------------|-------------|
| H                               | -6.16525600 | -0.12752800 | 0.22602400  |
| H                               | -6.80537200 | 0.73888900  | -2.02207000 |
| <b><math>\gamma</math>-P(R)</b> |             |             |             |
| C                               | 1.92151700  | -1.56554200 | 0.17955100  |
| H                               | 1.85882900  | -2.63413800 | 0.34503900  |
| C                               | 0.79443300  | -0.84417000 | 0.27488000  |
| C                               | -0.54486600 | -1.41919400 | 0.65045600  |
| H                               | -0.52796000 | -2.48706900 | 0.43316200  |
| C                               | 3.25079100  | -1.00107300 | -0.10444500 |
| O                               | 4.17954700  | -1.97674300 | -0.09668300 |
| O                               | 3.51823600  | 0.16363800  | -0.31223200 |
| C                               | 5.53336500  | -1.56074300 | -0.33999900 |
| C                               | 6.40975000  | -2.78602500 | -0.21450600 |
| H                               | 5.80109800  | -0.78983300 | 0.38888700  |
| H                               | 5.59134200  | -1.11650400 | -1.33862900 |
| H                               | 7.45275600  | -2.51431300 | -0.39949200 |
| H                               | 6.33678700  | -3.21452700 | 0.78881300  |
| H                               | 6.11811900  | -3.54884100 | -0.94150100 |
| C                               | -0.85375600 | -1.18784600 | 2.13537000  |
| H                               | -0.84821500 | -0.12205700 | 2.38257400  |
| H                               | -1.84167200 | -1.59327600 | 2.37197500  |
| H                               | -0.10845400 | -1.69028300 | 2.75703900  |
| C                               | -0.38232200 | 1.16324500  | -0.04312500 |
| N                               | -1.53272600 | -0.77902800 | -0.23047700 |
| N                               | -1.50883400 | 0.59329200  | -0.21641700 |

|                                      |             |             |             |
|--------------------------------------|-------------|-------------|-------------|
| O                                    | 0.80876200  | 0.49902900  | 0.11709300  |
| C                                    | -0.22071200 | 2.62826400  | -0.05842300 |
| C                                    | 1.05788000  | 3.19552800  | -0.05057700 |
| C                                    | -1.35229600 | 3.45296000  | -0.08616600 |
| C                                    | 1.19764900  | 4.58214000  | -0.07153100 |
| H                                    | 1.93177700  | 2.55168600  | -0.03856300 |
| C                                    | -1.20290600 | 4.83402400  | -0.10695300 |
| H                                    | -2.33924200 | 3.00167100  | -0.09001300 |
| C                                    | 0.07255800  | 5.40328300  | -0.09874600 |
| H                                    | 2.19143200  | 5.01912500  | -0.06882700 |
| H                                    | -2.08290300 | 5.46942600  | -0.12678300 |
| H                                    | 0.18658700  | 6.48289100  | -0.11394300 |
| C                                    | -2.83549600 | -1.34439700 | -0.26851900 |
| C                                    | -2.97089100 | -2.70918400 | -0.55276200 |
| C                                    | -3.97909600 | -0.57167500 | -0.04436400 |
| C                                    | -4.23316100 | -3.29208000 | -0.59354800 |
| H                                    | -2.09303600 | -3.31028300 | -0.76839900 |
| C                                    | -5.23850000 | -1.16597300 | -0.09806600 |
| H                                    | -3.87411900 | 0.48551900  | 0.16667000  |
| C                                    | -5.37628000 | -2.52613000 | -0.36547400 |
| H                                    | -4.32169100 | -4.35036700 | -0.82044500 |
| H                                    | -6.11893000 | -0.55556800 | 0.08066800  |
| H                                    | -6.35991900 | -2.98295500 | -0.40371500 |
| <b><math>\gamma</math>-TS2/4(RS)</b> |             |             |             |
| C                                    | -0.32551500 | 0.42687400  | 1.63429700  |

|   |             |             |             |
|---|-------------|-------------|-------------|
| H | -1.14835200 | 0.50651100  | 2.33473300  |
| C | 0.58588900  | -0.61558200 | 1.85130900  |
| C | -0.17250100 | -1.90004600 | 1.72365600  |
| H | 0.52516900  | -2.73007700 | 1.57133500  |
| C | 0.10872700  | 1.76460500  | 1.09992000  |
| O | -0.57790300 | 2.75601900  | 1.67115600  |
| O | 0.94994400  | 1.93457400  | 0.24533100  |
| C | -0.37721800 | 4.06312300  | 1.09984400  |
| C | -1.24677500 | 5.03153100  | 1.86601600  |
| H | -0.65142400 | 4.01247900  | 0.03993700  |
| H | 0.68403400  | 4.31981000  | 1.16961600  |
| H | -1.14113000 | 6.03321000  | 1.43959500  |
| H | -2.29830200 | 4.73895700  | 1.80365300  |
| H | -0.95537700 | 5.07029500  | 2.91939500  |
| C | -1.08946000 | -2.20718700 | 2.90918600  |
| H | -1.81148800 | -1.40099500 | 3.06902100  |
| H | -1.65648600 | -3.12593500 | 2.73923200  |
| H | -0.49558800 | -2.32754700 | 3.81909900  |
| C | 2.97135800  | -0.22467200 | 1.66744900  |
| C | 4.16691500  | -0.14322300 | 1.00069600  |
| C | 4.22819400  | -0.45185600 | -0.38500800 |
| C | 3.00549700  | -0.83348900 | -0.99719500 |
| C | 1.84553000  | -0.87589800 | -0.26713000 |
| N | 1.82067400  | -0.58361300 | 1.05882600  |
| H | 2.88034000  | -0.00438300 | 2.72417400  |

|   |             |             |             |
|---|-------------|-------------|-------------|
| H | 5.04327700  | 0.15489300  | 1.56006000  |
| H | 2.94556000  | -1.07523300 | -2.04974300 |
| H | 0.89321300  | -1.13916600 | -0.72104800 |
| N | 5.38137600  | -0.38413400 | -1.07794000 |
| C | 6.61152200  | 0.01660600  | -0.41183300 |
| H | 6.52759500  | 1.02925200  | -0.00164600 |
| H | 6.86635300  | -0.67544700 | 0.39868800  |
| H | 7.42317500  | 0.00766500  | -1.13720900 |
| C | 5.39813600  | -0.69658700 | -2.50053300 |
| H | 5.08320600  | -1.73015600 | -2.68178800 |
| H | 4.74131600  | -0.02209300 | -3.06055700 |
| H | 6.41361000  | -0.57747200 | -2.87479500 |
| C | -1.32272800 | 0.08399700  | -0.98960100 |
| N | -0.95781400 | -1.72646600 | 0.43111000  |
| N | -1.41266900 | -0.39480100 | 0.28801000  |
| O | -0.87848100 | -0.52680400 | -1.96690900 |
| C | -1.92444900 | 1.45500200  | -1.16413900 |
| C | -1.55488200 | 2.20932400  | -2.28259400 |
| C | -2.87086000 | 1.96908000  | -0.27137200 |
| C | -2.11645700 | 3.46425700  | -2.50213300 |
| H | -0.82811400 | 1.79183700  | -2.97243600 |
| C | -3.44224300 | 3.22087200  | -0.49821200 |
| H | -3.16662800 | 1.37483200  | 0.58769400  |
| C | -3.06510400 | 3.97172400  | -1.61102100 |
| H | -1.82255200 | 4.04508900  | -3.37147200 |



|   |             |             |             |
|---|-------------|-------------|-------------|
| H | -4.18904000 | 3.60506900  | 0.19065400  |
| H | -3.51421700 | 4.94496800  | -1.78801900 |
| C | -1.85096600 | -2.73075400 | 0.04960700  |
| C | -1.51828300 | -4.08303100 | 0.27535900  |
| C | -3.05972600 | -2.45444800 | -0.61379800 |
| C | -2.36482300 | -5.10494100 | -0.13590700 |
| H | -0.58752000 | -4.33709700 | 0.77163000  |
| C | -3.89766300 | -3.49021900 | -1.02079800 |
| H | -3.34316800 | -1.42846100 | -0.81300300 |
| C | -3.56584500 | -4.82274200 | -0.78861500 |
| H | -2.07775500 | -6.13541000 | 0.05558000  |
| H | -4.82376500 | -3.24271400 | -1.53248200 |
| H | -4.22301000 | -5.62381700 | -1.11126500 |

**$\gamma$ -4(RS)**

|   |             |             |             |
|---|-------------|-------------|-------------|
| C | -0.23409700 | 0.31373100  | 0.25423900  |
| H | -0.12265600 | 0.80874600  | 1.23135200  |
| C | 0.62974200  | -0.87954400 | 0.05639000  |
| C | -0.16740000 | -2.12100200 | -0.13420800 |
| H | 0.16819400  | -2.70780800 | -1.00229600 |
| C | -0.00755700 | 1.39121600  | -0.83712700 |
| O | 0.43988600  | 2.53601600  | -0.31093100 |
| O | -0.20243100 | 1.21515500  | -2.01436400 |
| C | 0.67365300  | 3.60801700  | -1.24542500 |
| C | 1.13507600  | 4.80883100  | -0.45407700 |
| H | -0.26116600 | 3.80322700  | -1.78028300 |

|   |             |             |             |
|---|-------------|-------------|-------------|
| H | 1.42343900  | 3.27791100  | -1.97134900 |
| H | 1.31928700  | 5.64534100  | -1.13403300 |
| H | 0.37317400  | 5.11155400  | 0.26974200  |
| H | 2.06298500  | 4.59188100  | 0.08295200  |
| C | -0.16873500 | -3.00956300 | 1.12351400  |
| H | -0.66495100 | -2.48517000 | 1.94663700  |
| H | -0.68066400 | -3.96222200 | 0.95736400  |
| H | 0.86066900  | -3.22277800 | 1.43019800  |
| C | 2.68477900  | 0.30880900  | 0.39037300  |
| C | 4.06157000  | 0.36061500  | 0.38181700  |
| C | 4.85501000  | -0.75409300 | 0.06179300  |
| C | 4.12556600  | -1.92693400 | -0.20201400 |
| C | 2.74962800  | -1.95933300 | -0.18993400 |
| N | 1.97511700  | -0.84189900 | 0.08323700  |
| H | 2.09719300  | 1.17575900  | 0.65587300  |
| H | 4.50240000  | 1.31624300  | 0.63854700  |
| H | 4.62068900  | -2.86285600 | -0.42927900 |
| H | 2.20951200  | -2.86852800 | -0.40722400 |
| N | 6.24961300  | -0.69822900 | -0.01238200 |
| C | 6.90014800  | 0.39562100  | 0.68529100  |
| H | 6.58016200  | 1.35800300  | 0.27754000  |
| H | 6.69943800  | 0.38862800  | 1.76969900  |
| H | 7.97743800  | 0.32043900  | 0.52893100  |
| C | 6.95718200  | -1.96471900 | 0.02593000  |
| H | 6.75470300  | -2.53779700 | 0.94630000  |

|   |             |             |             |
|---|-------------|-------------|-------------|
| H | 6.69006900  | -2.58256600 | -0.83574900 |
| H | 8.02897200  | -1.76977500 | -0.03410200 |
| C | -2.62423200 | 0.52745600  | -0.33683400 |
| N | -1.50022700 | -1.56482700 | -0.48492300 |
| N | -1.58686400 | -0.27147500 | 0.13383300  |
| O | -3.48980500 | 0.11270300  | -1.08360100 |
| C | -2.64421000 | 1.92821400  | 0.20116400  |
| C | -2.95469600 | 2.96042800  | -0.68796200 |
| C | -2.39214800 | 2.21408400  | 1.54567300  |
| C | -2.98069900 | 4.27810600  | -0.23960500 |
| H | -3.16346600 | 2.71791900  | -1.72603900 |
| C | -2.43884800 | 3.53181000  | 1.99551500  |
| H | -2.17416300 | 1.40564800  | 2.23882500  |
| C | -2.72249900 | 4.56440500  | 1.10199700  |
| H | -3.20797400 | 5.08147500  | -0.93403300 |
| H | -2.25450400 | 3.75255900  | 3.04240200  |
| H | -2.75001200 | 5.59207400  | 1.45225300  |
| C | -2.59091600 | -2.43728100 | -0.20316400 |
| C | -2.68710300 | -3.57797100 | -1.00743500 |
| C | -3.52206800 | -2.23510800 | 0.81736700  |
| C | -3.68562300 | -4.51748100 | -0.77864900 |
| H | -1.97707200 | -3.70985700 | -1.81879500 |
| C | -4.53184300 | -3.17398800 | 1.02914400  |
| H | -3.46428400 | -1.34800600 | 1.43975900  |
| C | -4.61692300 | -4.32049200 | 0.24231400  |

|   |             |             |             |
|---|-------------|-------------|-------------|
| H | -3.74583100 | -5.39825300 | -1.41109100 |
| H | -5.25757700 | -3.00403100 | 1.81916800  |
| H | -5.40522600 | -5.04676200 | 0.41301200  |

**$\gamma$ -TS2/5(RS)**

|   |             |             |             |
|---|-------------|-------------|-------------|
| C | 0.88387300  | -1.30043300 | 0.88428200  |
| H | 1.75371500  | -1.17976400 | 1.52738500  |
| C | -0.27827500 | -0.70706800 | 1.42037700  |
| C | -0.13275100 | 0.74698600  | 1.80678900  |
| H | -1.09255700 | 1.09632800  | 2.19526700  |
| C | 0.78942700  | -2.71099900 | 0.35986600  |
| O | 1.76568800  | -3.47619200 | 0.86304700  |
| O | -0.05094900 | -3.12412400 | -0.40785400 |
| C | 1.76035700  | -4.85566900 | 0.45452200  |
| C | 2.93420600  | -5.53186200 | 1.12433600  |
| H | 1.83037400  | -4.89828100 | -0.63649600 |
| H | 0.80665500  | -5.30312500 | 0.75139500  |
| H | 2.95802000  | -6.58809200 | 0.84147700  |
| H | 3.87666200  | -5.07057600 | 0.81740900  |
| H | 2.85194900  | -5.46706000 | 2.21259000  |
| C | 0.90909500  | 1.02076400  | 2.89333200  |
| H | 1.91714000  | 0.71757000  | 2.60182200  |
| H | 0.94174800  | 2.09314000  | 3.11197600  |
| H | 0.63508100  | 0.48177400  | 3.80396600  |
| C | -2.64878500 | -1.21528000 | 1.30948800  |
| C | -3.86705300 | -1.30953500 | 0.68553900  |

|   |             |             |             |
|---|-------------|-------------|-------------|
| C | -3.96652300 | -1.07791300 | -0.71318600 |
| C | -2.76225800 | -0.73685600 | -1.38027900 |
| C | -1.58404000 | -0.64626400 | -0.68106500 |
| N | -1.51502800 | -0.88828800 | 0.65174100  |
| H | -2.52227000 | -1.40239300 | 2.36962100  |
| H | -4.72760400 | -1.57952900 | 1.28232600  |
| H | -2.73727200 | -0.53720200 | -2.44289800 |
| H | -0.64424400 | -0.38464700 | -1.15058800 |
| N | -5.14104000 | -1.18212100 | -1.36787500 |
| C | -6.35197800 | -1.53623900 | -0.64323000 |
| H | -6.25944600 | -2.52394500 | -0.17766700 |
| H | -6.58049200 | -0.79785400 | 0.13360000  |
| H | -7.18566200 | -1.56502000 | -1.34265700 |
| C | -5.19959200 | -0.93891500 | -2.80215600 |
| H | -4.90727100 | 0.08980800  | -3.04129800 |
| H | -4.54557800 | -1.62940900 | -3.34601900 |
| H | -6.22163100 | -1.09354900 | -3.14461200 |
| C | 2.02291300  | 0.63646800  | -0.32937400 |
| N | 0.11754300  | 1.58377500  | 0.58860700  |
| N | 1.46224700  | 1.67787000  | 0.18214800  |
| O | 1.50013500  | -0.57118600 | -0.51329300 |
| C | 3.43895300  | 0.79155200  | -0.79066600 |
| C | 4.17071500  | -0.34042900 | -1.16094500 |
| C | 4.05191000  | 2.05000600  | -0.84649500 |
| C | 5.49715900  | -0.21819800 | -1.57508300 |

|   |             |             |             |
|---|-------------|-------------|-------------|
| H | 3.68986700  | -1.31222100 | -1.12036600 |
| C | 5.37203500  | 2.17029700  | -1.26598800 |
| H | 3.48122800  | 2.92481500  | -0.55398800 |
| C | 6.10144900  | 1.03531500  | -1.62848500 |
| H | 6.05778000  | -1.10512000 | -1.85537500 |
| H | 5.83674100  | 3.15108900  | -1.30814300 |
| H | 7.13396600  | 1.13082700  | -1.95156900 |
| C | -0.55159500 | 2.82561500  | 0.52711600  |
| C | -1.94578800 | 2.85994600  | 0.71935200  |
| C | 0.10664800  | 4.02686800  | 0.22088900  |
| C | -2.64440900 | 4.05995300  | 0.64960300  |
| H | -2.48752200 | 1.93434300  | 0.89748700  |
| C | -0.60656100 | 5.22193000  | 0.14909400  |
| H | 1.17342300  | 4.01095900  | 0.04084000  |
| C | -1.98187800 | 5.25570300  | 0.36836600  |
| H | -3.72026100 | 4.05575300  | 0.80181300  |
| H | -0.07147000 | 6.13942900  | -0.08049900 |
| H | -2.52962900 | 6.19085200  | 0.30966200  |

**$\gamma$ -5(RS)**

|   |             |             |             |
|---|-------------|-------------|-------------|
| C | 0.79336600  | 1.44839200  | -0.77824900 |
| H | 1.59218200  | 1.51453000  | -1.52180100 |
| C | -0.34525500 | 0.74123500  | -1.36941900 |
| C | -0.01716500 | -0.66340900 | -1.79245600 |
| H | -0.92903800 | -1.13009900 | -2.17636500 |
| C | 0.42386800  | 2.84967800  | -0.33403600 |

|   |             |             |             |
|---|-------------|-------------|-------------|
| O | 0.86509400  | 3.77272200  | -1.19680100 |
| O | -0.21645900 | 3.11600600  | 0.65883400  |
| C | 0.47281900  | 5.12940400  | -0.92546100 |
| C | 1.04625300  | 5.99486800  | -2.02387500 |
| H | 0.85211600  | 5.41550000  | 0.06043800  |
| H | -0.62019800 | 5.17834000  | -0.89557300 |
| H | 0.76728900  | 7.03845200  | -1.85242800 |
| H | 2.13750300  | 5.92848200  | -2.04165900 |
| H | 0.66247400  | 5.68838100  | -3.00062400 |
| C | 1.04239100  | -0.76702400 | -2.89132700 |
| H | 2.00464300  | -0.34385400 | -2.59019400 |
| H | 1.21281300  | -1.81804100 | -3.14830000 |
| H | 0.69847400  | -0.23511900 | -3.78173300 |
| C | -2.75488400 | 0.87153300  | -1.09462200 |
| C | -3.94142800 | 0.75660600  | -0.41313600 |
| C | -3.93556800 | 0.47258000  | 0.97851900  |
| C | -2.66092000 | 0.31650100  | 1.57700000  |
| C | -1.52004700 | 0.42146100  | 0.81830300  |
| N | -1.54784000 | 0.70144500  | -0.50921700 |
| H | -2.71204600 | 1.11261400  | -2.15015500 |
| H | -4.86228100 | 0.90870400  | -0.95996100 |
| H | -2.54950500 | 0.10626000  | 2.63203900  |
| H | -0.53843500 | 0.29758600  | 1.25182000  |
| N | -5.07792400 | 0.36314600  | 1.68996700  |
| C | -6.36399800 | 0.56210100  | 1.04090700  |

|   |             |             |             |
|---|-------------|-------------|-------------|
| H | -6.44284900 | 1.56935200  | 0.61583400  |
| H | -6.52370300 | -0.17250800 | 0.24341500  |
| H | -7.15428500 | 0.44026100  | 1.78001300  |
| C | -5.02107500 | 0.07832300  | 3.11582600  |
| H | -4.51954600 | -0.87660600 | 3.30766100  |
| H | -4.49307600 | 0.87082700  | 3.65855000  |
| H | -6.03654500 | 0.01410400  | 3.50354800  |
| C | 2.09711900  | -0.31652800 | 0.33843200  |
| N | 0.36422800  | -1.54415600 | -0.61740600 |
| N | 1.66348400  | -1.42120500 | -0.13814100 |
| O | 1.45085300  | 0.86802300  | 0.44688300  |
| C | 3.45942800  | -0.30288100 | 0.94502700  |
| C | 4.06882800  | 0.91272100  | 1.27028200  |
| C | 4.14395600  | -1.49980400 | 1.19769100  |
| C | 5.34559100  | 0.93302300  | 1.83082300  |
| H | 3.53518500  | 1.83887600  | 1.08640700  |
| C | 5.41373000  | -1.47618500 | 1.76199200  |
| H | 3.66500200  | -2.44135500 | 0.95040900  |
| C | 6.02187300  | -0.25890600 | 2.07805100  |
| H | 5.80999700  | 1.88377400  | 2.07547900  |
| H | 5.93278300  | -2.40986600 | 1.95763500  |
| H | 7.01493600  | -0.24269300 | 2.51730800  |
| C | -0.01856100 | -2.90565800 | -0.74718900 |
| C | -1.38684100 | -3.20019300 | -0.85929900 |
| C | 0.89998500  | -3.96317100 | -0.74277900 |



|   |             |             |             |
|---|-------------|-------------|-------------|
| C | -1.81952700 | -4.51520900 | -0.99230300 |
| H | -2.11089400 | -2.38954300 | -0.81632800 |
| C | 0.45509100  | -5.27833600 | -0.86852700 |
| H | 1.95557200  | -3.74341900 | -0.63996700 |
| C | -0.90189000 | -5.56674100 | -0.99926300 |
| H | -2.88332100 | -4.72008900 | -1.07434800 |
| H | 1.18371000  | -6.08452800 | -0.86867000 |
| H | -1.24133100 | -6.59322300 | -1.09566900 |

**$\gamma$ -TS1/2(S)**

|   |             |             |            |
|---|-------------|-------------|------------|
| C | 0.21556400  | 0.79758200  | 1.52362500 |
| H | 1.16301800  | 0.91184400  | 2.03357000 |
| C | -0.25803400 | -0.47681000 | 1.32891500 |
| C | 0.53478100  | -1.62529600 | 1.51072000 |
| H | 0.02481100  | -2.58252100 | 1.44487700 |
| C | -0.42592800 | 2.03286300  | 1.08208200 |
| O | 0.34184400  | 3.09793800  | 1.39727100 |
| O | -1.49606100 | 2.14072700  | 0.50540100 |
| C | -0.14474100 | 4.38538700  | 0.99523900 |
| C | -1.11784500 | 4.94413000  | 2.01658100 |
| H | -0.60727000 | 4.30173200  | 0.00907900 |
| H | 0.75074500  | 5.00554700  | 0.91722100 |
| H | -0.64814500 | 5.00953600  | 3.00224000 |
| H | -1.43195600 | 5.94915900  | 1.71803300 |
| H | -2.00784300 | 4.31348000  | 2.08799200 |
| C | 1.75253200  | -1.54063100 | 2.38180000 |

|   |             |             |             |
|---|-------------|-------------|-------------|
| H | 2.20272100  | -2.52567100 | 2.52172600  |
| H | 2.50543400  | -0.88027900 | 1.92789800  |
| H | 1.50609300  | -1.13361600 | 3.37056300  |
| C | -1.70884600 | -1.43200000 | -0.37455200 |
| C | -2.94364400 | -1.69424600 | -0.90727800 |
| C | -4.11738300 | -1.18315600 | -0.29147800 |
| C | -3.93202800 | -0.42228600 | 0.89699700  |
| C | -2.67123900 | -0.20285600 | 1.37651900  |
| N | -1.57447300 | -0.69793700 | 0.75735800  |
| H | -0.77575400 | -1.74717300 | -0.83220200 |
| H | -2.98667400 | -2.26891300 | -1.82200600 |
| H | -4.76549300 | 0.00222600  | 1.43900600  |
| H | -2.48586800 | 0.36901700  | 2.27718100  |
| N | -5.34176000 | -1.41077300 | -0.79996200 |
| C | -5.49279100 | -2.20346400 | -2.01289700 |
| H | -5.00852800 | -1.71744000 | -2.86703400 |
| H | -5.06480100 | -3.20273300 | -1.88257700 |
| H | -6.55340000 | -2.31194700 | -2.23214300 |
| C | -6.51683600 | -0.82314900 | -0.17161600 |
| H | -6.65521700 | -1.20681100 | 0.84522500  |
| H | -6.43667100 | 0.26843400  | -0.13314800 |
| H | -7.39659800 | -1.08186400 | -0.75827500 |
| C | 1.22314000  | 0.47703800  | -1.16464200 |
| N | 1.43971600  | -1.62104700 | -0.42218400 |
| N | 2.02560100  | -0.45096800 | -0.51965900 |

|                                 |             |             |             |
|---------------------------------|-------------|-------------|-------------|
| O                               | 0.12753900  | 0.25353500  | -1.68405500 |
| C                               | 1.84186300  | 1.84690400  | -1.26978100 |
| C                               | 1.14990300  | 2.82699900  | -1.98664100 |
| C                               | 3.06165700  | 2.17156200  | -0.66539800 |
| C                               | 1.67318600  | 4.11295900  | -2.10965600 |
| H                               | 0.20016300  | 2.55914000  | -2.43933900 |
| C                               | 3.58206600  | 3.45781700  | -0.78467000 |
| H                               | 3.58869900  | 1.41043700  | -0.10017900 |
| C                               | 2.89087400  | 4.43143700  | -1.50854300 |
| H                               | 1.12954400  | 4.86759200  | -2.67126800 |
| H                               | 4.52874100  | 3.70276100  | -0.31194100 |
| H                               | 3.30036700  | 5.43330600  | -1.60179700 |
| C                               | 2.35849600  | -2.68445700 | -0.18979700 |
| C                               | 1.82848700  | -3.98146300 | -0.13296300 |
| C                               | 3.74270600  | -2.50485200 | -0.07801500 |
| C                               | 2.66155200  | -5.07647600 | 0.06028000  |
| H                               | 0.75570500  | -4.11419500 | -0.24816100 |
| C                               | 4.57318600  | -3.60818600 | 0.11313100  |
| H                               | 4.14709100  | -1.50247800 | -0.15711000 |
| C                               | 4.04150300  | -4.89463200 | 0.19041700  |
| H                               | 2.23767600  | -6.07554100 | 0.10056400  |
| H                               | 5.64607200  | -3.46014400 | 0.19684700  |
| H                               | 4.69408400  | -5.74971700 | 0.33710200  |
| <b><math>\gamma</math>-2(S)</b> |             |             |             |
| C                               | -2.35468300 | -1.11295200 | -1.28504300 |

|   |             |             |             |
|---|-------------|-------------|-------------|
| H | -2.32333200 | -1.83966500 | -2.08711300 |
| C | -1.26178700 | -0.37554500 | -1.04478500 |
| C | -0.03566500 | -0.38077600 | -1.96971100 |
| H | -0.31965200 | 0.24702500  | -2.81713200 |
| C | -3.65422000 | -1.00438300 | -0.58690500 |
| O | -4.52030000 | -1.89290400 | -1.09652100 |
| O | -3.95129800 | -0.22482900 | 0.29591200  |
| C | -5.84597200 | -1.88315600 | -0.53725300 |
| C | -6.65014900 | -2.93329100 | -1.26837900 |
| H | -6.27069000 | -0.88240500 | -0.66028400 |
| H | -5.77575400 | -2.09350600 | 0.53427800  |
| H | -7.66967600 | -2.95538400 | -0.87368600 |
| H | -6.69860100 | -2.71083700 | -2.33770000 |
| H | -6.20703100 | -3.92401300 | -1.13734400 |
| C | 0.23264000  | -1.77079400 | -2.56012700 |
| H | -0.55527100 | -2.04381700 | -3.26624700 |
| H | 1.17919900  | -1.73976800 | -3.10404600 |
| H | 0.29280700  | -2.52717600 | -1.77561100 |
| C | -1.39057300 | 0.10415500  | 1.32371500  |
| C | -1.27571700 | 0.94230900  | 2.39640700  |
| C | -0.96724500 | 2.31678400  | 2.20558900  |
| C | -0.82831300 | 2.75578100  | 0.85801600  |
| C | -0.95840000 | 1.86017200  | -0.16452600 |
| N | -1.24145200 | 0.55387100  | 0.05280900  |
| H | -1.57424600 | -0.95431700 | 1.42943200  |

|   |             |             |             |
|---|-------------|-------------|-------------|
| H | -1.39430300 | 0.51714000  | 3.38304700  |
| H | -0.59957300 | 3.78251600  | 0.60755400  |
| H | -0.84866800 | 2.16801100  | -1.19664600 |
| N | -0.80946800 | 3.15608300  | 3.24094200  |
| C | -0.94638700 | 2.66311900  | 4.60580100  |
| H | -1.94145400 | 2.23689100  | 4.76940000  |
| H | -0.19015400 | 1.90167100  | 4.82597300  |
| H | -0.81234400 | 3.49306300  | 5.29673800  |
| C | -0.45056000 | 4.54972900  | 3.00782200  |
| H | 0.48840300  | 4.62322600  | 2.44947900  |
| H | -1.23893700 | 5.07104600  | 2.45427200  |
| H | -0.31863000 | 5.04628900  | 3.96757400  |
| C | 1.65307100  | -1.46753000 | 0.11397600  |
| N | 1.15040200  | 0.22267100  | -1.36955600 |
| N | 2.11550000  | -0.63536600 | -0.79523700 |
| O | 0.45919100  | -1.60302900 | 0.51463800  |
| C | 2.70953100  | -2.37822600 | 0.70046400  |
| C | 2.33361700  | -3.25628900 | 1.71999800  |
| C | 4.04224500  | -2.37092700 | 0.27010900  |
| C | 3.26843300  | -4.10787000 | 2.30772200  |
| H | 1.29539000  | -3.25445000 | 2.03645400  |
| C | 4.97679100  | -3.22149200 | 0.85580500  |
| H | 4.33153100  | -1.69709300 | -0.52980600 |
| C | 4.59415400  | -4.09299300 | 1.87751300  |
| H | 2.96104300  | -4.78455400 | 3.10041100  |

|   |            |             |             |
|---|------------|-------------|-------------|
| H | 6.00751400 | -3.20822800 | 0.51234800  |
| H | 5.32432500 | -4.75761100 | 2.33066200  |
| C | 1.70535300 | 1.37610200  | -1.92952100 |
| C | 1.02933600 | 2.20998900  | -2.84922100 |
| C | 2.99479900 | 1.79060000  | -1.52141200 |
| C | 1.61678900 | 3.37839800  | -3.33216600 |
| H | 0.03727300 | 1.97436700  | -3.21679000 |
| C | 3.56304700 | 2.95845000  | -2.01315300 |
| H | 3.53344900 | 1.17164400  | -0.81669700 |
| C | 2.88743300 | 3.77176000  | -2.92514000 |
| H | 1.05944500 | 3.98175400  | -4.04398900 |
| H | 4.55800700 | 3.23572600  | -1.67476000 |
| H | 3.33889600 | 4.68100500  | -3.30827400 |

**$\gamma$ -TS2/3(SR)**

|   |             |             |             |
|---|-------------|-------------|-------------|
| C | 2.39180000  | 0.27628300  | -1.47468400 |
| H | 2.62048300  | 0.68582300  | -2.44908300 |
| C | 1.07077900  | 0.14086000  | -1.12228800 |
| C | -0.02143600 | 0.04662500  | -2.19201800 |
| H | 0.10644700  | -0.92820300 | -2.66624400 |
| C | 3.52170000  | 0.02606800  | -0.60850400 |
| O | 4.68773500  | 0.28740800  | -1.25369300 |
| O | 3.51975200  | -0.38380600 | 0.54639900  |
| C | 5.88508400  | 0.07051100  | -0.50046300 |
| C | 7.05237100  | 0.44629600  | -1.38602200 |
| H | 5.93257600  | -0.97977700 | -0.19447600 |

|   |             |             |             |
|---|-------------|-------------|-------------|
| H | 5.85398500  | 0.68097700  | 0.40773000  |
| H | 7.99135900  | 0.29346600  | -0.84587100 |
| H | 7.06986100  | -0.16885300 | -2.28993700 |
| H | 6.99295900  | 1.49705700  | -1.68308400 |
| C | 0.10307100  | 1.11585700  | -3.27696500 |
| H | 1.01854500  | 0.98469200  | -3.85842500 |
| H | -0.74865300 | 1.02684300  | -3.95728200 |
| H | 0.10534800  | 2.11444900  | -2.83523400 |
| C | 0.90927300  | -0.16318900 | 1.32633800  |
| C | 0.61857000  | -0.91020400 | 2.43624200  |
| C | 0.16041000  | -2.24708900 | 2.30379100  |
| C | 0.04441000  | -2.74515400 | 0.97556700  |
| C | 0.34593600  | -1.93719100 | -0.08425400 |
| N | 0.75592000  | -0.65639500 | 0.07562500  |
| H | 1.26007400  | 0.85627600  | 1.38511500  |
| H | 0.75805900  | -0.44828200 | 3.40368600  |
| H | -0.28869900 | -3.75263500 | 0.76736700  |
| H | 0.26510100  | -2.29875600 | -1.10181100 |
| N | -0.14547500 | -3.00405200 | 3.37114800  |
| C | 0.01388100  | -2.46496200 | 4.71540300  |
| H | -0.31254900 | -3.21176500 | 5.43679300  |
| H | 1.06167800  | -2.21842700 | 4.91960700  |
| H | -0.59722900 | -1.56637200 | 4.85076500  |
| C | -0.60796300 | -4.37367600 | 3.18936200  |
| H | -1.52899000 | -4.40060900 | 2.59782300  |

|   |             |             |             |
|---|-------------|-------------|-------------|
| H | 0.15383800  | -4.98566200 | 2.69394400  |
| H | -0.81510300 | -4.81001600 | 4.16500400  |
| C | -0.87522800 | 1.90790000  | -0.30893900 |
| N | -1.33373600 | 0.03449700  | -1.56283800 |
| N | -1.77060300 | 1.10788500  | -0.80313900 |
| O | 0.41933200  | 1.80576500  | -0.42215500 |
| C | -1.38880900 | 3.06707100  | 0.48806300  |
| C | -0.47596600 | 3.90833300  | 1.13073400  |
| C | -2.76059000 | 3.31982700  | 0.61936000  |
| C | -0.92526200 | 4.97904000  | 1.90337900  |
| H | 0.58524000  | 3.71423400  | 1.01188200  |
| C | -3.20631000 | 4.38691300  | 1.39216700  |
| H | -3.46588900 | 2.67364100  | 0.10709800  |
| C | -2.29060800 | 5.22028900  | 2.03908300  |
| H | -0.20616500 | 5.62664500  | 2.39686100  |
| H | -4.27204400 | 4.57427700  | 1.48746200  |
| H | -2.64075200 | 6.05452500  | 2.64000000  |
| C | -2.28931300 | -0.93741100 | -1.83189600 |
| C | -2.14712200 | -1.88313400 | -2.86905900 |
| C | -3.44641300 | -1.01293000 | -1.02590000 |
| C | -3.10723400 | -2.87609200 | -3.05897500 |
| H | -1.31284900 | -1.83903100 | -3.56028600 |
| C | -4.39542700 | -2.00387100 | -1.23880200 |
| H | -3.57540600 | -0.28637300 | -0.23441100 |
| C | -4.23708500 | -2.95510800 | -2.24904900 |



|   |             |             |             |
|---|-------------|-------------|-------------|
| H | -2.96885200 | -3.58667000 | -3.86923100 |
| H | -5.27226600 | -2.03395300 | -0.59765100 |
| H | -4.98249900 | -3.72719000 | -2.40811200 |

**$\gamma$ -3(SR)**

|   |             |             |             |
|---|-------------|-------------|-------------|
| C | 1.80450500  | 0.15525400  | -1.97209000 |
| H | 1.74347100  | 0.07074000  | -3.04702700 |
| C | 0.58414900  | 0.28463600  | -1.19444100 |
| C | -0.71263500 | 0.12156800  | -2.02034300 |
| H | -0.70441500 | -0.86181900 | -2.48991900 |
| C | 3.04445600  | 0.21370400  | -1.32387100 |
| O | 4.11526700  | 0.08861800  | -2.18500600 |
| O | 3.25017200  | 0.34549200  | -0.10335900 |
| C | 5.40376200  | 0.16071900  | -1.58669000 |
| C | 6.42760600  | -0.00248200 | -2.69080500 |
| H | 5.50731000  | -0.62536200 | -0.83021700 |
| H | 5.52211500  | 1.12359300  | -1.07632300 |
| H | 7.43899800  | 0.05124900  | -2.27589800 |
| H | 6.30916100  | -0.96862000 | -3.19035900 |
| H | 6.31982800  | 0.78745500  | -3.43985200 |
| C | -0.83849300 | 1.19919600  | -3.09867100 |
| H | -0.04802000 | 1.10748300  | -3.84532100 |
| H | -1.80714500 | 1.09721900  | -3.59692300 |
| H | -0.77951900 | 2.19794800  | -2.65826500 |
| C | 0.92569100  | -0.41565300 | 1.21890400  |
| C | 1.01030000  | -1.34353200 | 2.22910600  |

|   |             |             |             |
|---|-------------|-------------|-------------|
| C | 0.71895000  | -2.70555500 | 1.97445800  |
| C | 0.36256600  | -3.03080300 | 0.63535600  |
| C | 0.30795700  | -2.04775000 | -0.31397800 |
| N | 0.55201900  | -0.75002400 | -0.03225700 |
| H | 1.17771200  | 0.62198600  | 1.38331200  |
| H | 1.32339700  | -0.99910900 | 3.20486800  |
| H | 0.14997600  | -4.04647500 | 0.33156400  |
| H | 0.08807700  | -2.28729700 | -1.34656700 |
| N | 0.78845400  | -3.64475300 | 2.93698300  |
| C | 1.21951300  | -3.27736100 | 4.27813400  |
| H | 1.24755200  | -4.17174000 | 4.89819200  |
| H | 2.22268200  | -2.83760300 | 4.26109300  |
| H | 0.52517700  | -2.56207200 | 4.73262800  |
| C | 0.47609900  | -5.03363000 | 2.63134700  |
| H | -0.53672600 | -5.12816400 | 2.22602900  |
| H | 1.18841200  | -5.45354500 | 1.91185400  |
| H | 0.52968400  | -5.61652100 | 3.54927800  |
| C | -0.73564000 | 1.81460500  | 0.06227200  |
| N | -1.82077300 | 0.16996200  | -1.07939900 |
| N | -1.82478200 | 1.17544800  | -0.15612000 |
| O | 0.46960000  | 1.54757900  | -0.51185200 |
| C | -0.70353500 | 2.94960500  | 1.00812600  |
| C | 0.51995100  | 3.52896800  | 1.36150600  |
| C | -1.89268900 | 3.45328600  | 1.55230700  |
| C | 0.55095100  | 4.59722500  | 2.25704800  |

|   |             |             |             |
|---|-------------|-------------|-------------|
| H | 1.44006400  | 3.14509500  | 0.93189400  |
| C | -1.85331100 | 4.51617400  | 2.44634700  |
| H | -2.83840700 | 3.00819800  | 1.26030300  |
| C | -0.63143300 | 5.09256500  | 2.80178700  |
| H | 1.50392300  | 5.04310900  | 2.52528200  |
| H | -2.77884500 | 4.90344400  | 2.86166400  |
| H | -0.60457900 | 5.92688400  | 3.49627200  |
| C | -3.03248900 | -0.49403200 | -1.28675300 |
| C | -3.25927700 | -1.25985200 | -2.44284900 |
| C | -4.05036500 | -0.41465100 | -0.31887800 |
| C | -4.46554900 | -1.93844700 | -2.60897500 |
| H | -2.51733100 | -1.31658200 | -3.23118500 |
| C | -5.24884200 | -1.09102200 | -0.50743200 |
| H | -3.88303000 | 0.17481200  | 0.57388200  |
| C | -5.47136300 | -1.86166500 | -1.64980900 |
| H | -4.61884200 | -2.51917400 | -3.51416600 |
| H | -6.01933300 | -1.01399800 | 0.25459400  |
| H | -6.41109700 | -2.38550000 | -1.79006500 |

**$\gamma$ -TS3/P(SR)**

|   |             |             |             |
|---|-------------|-------------|-------------|
| C | -1.72671600 | -0.22162700 | -2.01619700 |
| H | -1.59355000 | 0.14593100  | -3.02520400 |
| C | -0.57650700 | -0.48252600 | -1.24289300 |
| C | 0.74436300  | -0.64691000 | -1.99838800 |
| H | 0.89929900  | 0.24451800  | -2.61152200 |
| C | -3.03479600 | -0.29804100 | -1.47191600 |

|   |             |             |             |
|---|-------------|-------------|-------------|
| O | -3.99907300 | -0.04483400 | -2.41446300 |
| O | -3.36050900 | -0.54764600 | -0.30710500 |
| C | -5.34740900 | -0.10014400 | -1.95360000 |
| C | -6.24764300 | 0.15450200  | -3.14382600 |
| H | -5.49806000 | 0.65200800  | -1.17102800 |
| H | -5.54172300 | -1.08166600 | -1.50848500 |
| H | -7.29617800 | 0.12529700  | -2.83193500 |
| H | -6.04626400 | 1.13606800  | -3.58269000 |
| H | -6.09595800 | -0.60613800 | -3.91503600 |
| C | 0.70382800  | -1.89167100 | -2.89009600 |
| H | -0.04811200 | -1.78585600 | -3.67388300 |
| H | 1.68429100  | -2.04622800 | -3.34985900 |
| H | 0.45787100  | -2.77569800 | -2.29461400 |
| C | -1.02506600 | 0.96162800  | 0.97475200  |
| C | -1.05754200 | 2.07740200  | 1.78217400  |
| C | -0.25704100 | 3.20305100  | 1.46555900  |
| C | 0.55235700  | 3.09253100  | 0.30532800  |
| C | 0.52314100  | 1.93352700  | -0.43753000 |
| N | -0.24323200 | 0.88130100  | -0.11583800 |
| H | -1.65366200 | 0.09889000  | 1.17028000  |
| H | -1.70962300 | 2.06719700  | 2.64520600  |
| H | 1.20553300  | 3.89388000  | -0.01326700 |
| H | 1.14534800  | 1.83987600  | -1.32192100 |
| N | -0.26216600 | 4.32149400  | 2.22720900  |
| C | -1.11023400 | 4.39200600  | 3.40606100  |

|   |             |             |             |
|---|-------------|-------------|-------------|
| H | -0.84608500 | 3.61397200  | 4.13149100  |
| H | -0.97484900 | 5.36218200  | 3.88160200  |
| H | -2.16863000 | 4.28221900  | 3.14211000  |
| C | 0.56310100  | 5.45914200  | 1.85599300  |
| H | 1.62615100  | 5.19230500  | 1.84356800  |
| H | 0.28483700  | 5.84691500  | 0.86904100  |
| H | 0.42050000  | 6.25345000  | 2.58735100  |
| C | 0.40428400  | -1.77516300 | 0.44025900  |
| N | 1.81416500  | -0.73204000 | -1.01525200 |
| N | 1.59609400  | -1.42314100 | 0.13652800  |
| O | -0.71220600 | -1.48867200 | -0.29011500 |
| C | 0.11029100  | -2.54174300 | 1.66610500  |
| C | -1.22046900 | -2.77159200 | 2.03516300  |
| C | 1.14998200  | -3.02734200 | 2.46917200  |
| C | -1.50308800 | -3.48025400 | 3.20216200  |
| H | -2.02343700 | -2.39406900 | 1.40780700  |
| C | 0.85872200  | -3.72830700 | 3.63326000  |
| H | 2.17838300  | -2.85263900 | 2.16921900  |
| C | -0.46872700 | -3.95717000 | 4.00399800  |
| H | -2.53697000 | -3.65763400 | 3.48256000  |
| H | 1.66849400  | -4.10222000 | 4.25258100  |
| H | -0.69267200 | -4.50899000 | 4.91199500  |
| C | 3.13055500  | -0.35927100 | -1.29120300 |
| C | 3.49548000  | 0.12458400  | -2.55976300 |
| C | 4.11667900  | -0.44323800 | -0.29095500 |

|   |            |             |             |
|---|------------|-------------|-------------|
| C | 4.80825500 | 0.52200700  | -2.80755200 |
| H | 2.77574800 | 0.17266700  | -3.36898200 |
| C | 5.42091800 | -0.04957600 | -0.56132700 |
| H | 3.84313900 | -0.81162100 | 0.68956500  |
| C | 5.78333300 | 0.43884100  | -1.81793200 |
| H | 5.06622600 | 0.88654100  | -3.79775200 |
| H | 6.16481600 | -0.12523300 | 0.22678600  |
| H | 6.80511300 | 0.74210400  | -2.02089300 |

**$\gamma$ -P(S)**

|   |             |             |             |
|---|-------------|-------------|-------------|
| C | -1.92143900 | -1.56557700 | 0.17967200  |
| H | -1.85875400 | -2.63417000 | 0.34517600  |
| C | -0.79438400 | -0.84415200 | 0.27505200  |
| C | 0.54492800  | -1.41908200 | 0.65068400  |
| H | 0.52804900  | -2.48698200 | 0.43350800  |
| C | -3.25072100 | -1.00115200 | -0.10440700 |
| O | -4.17947200 | -1.97681100 | -0.09647400 |
| O | -3.51817300 | 0.16353400  | -0.31237900 |
| C | -5.53328200 | -1.56087200 | -0.33998000 |
| C | -6.40957800 | -2.78625800 | -0.21488300 |
| H | -5.59110100 | -1.11645200 | -1.33853600 |
| H | -5.80121800 | -0.79012500 | 0.38900200  |
| H | -7.45259800 | -2.51457300 | -0.39981200 |
| H | -6.11785800 | -3.54882200 | -0.94210400 |
| H | -6.33659000 | -3.21505900 | 0.78830600  |
| C | 0.85388200  | -1.18757400 | 2.13556000  |

|   |             |             |             |
|---|-------------|-------------|-------------|
| H | 0.10859100  | -1.68988800 | 2.75733900  |
| H | 1.84179400  | -1.59301700 | 2.37214500  |
| H | 0.84841000  | -0.12175200 | 2.38262500  |
| C | 0.38229800  | 1.16327900  | -0.04311400 |
| N | 1.53273600  | -0.77897400 | -0.23035400 |
| N | 1.50881800  | 0.59333700  | -0.21643900 |
| O | -0.80874700 | 0.49903600  | 0.11721900  |
| C | 0.22064000  | 2.62829200  | -0.05843100 |
| C | -1.05798000 | 3.19550400  | -0.05049100 |
| C | 1.35218700  | 3.45303200  | -0.08629400 |
| C | -1.19780600 | 4.58210900  | -0.07147100 |
| H | -1.93184300 | 2.55161600  | -0.03837600 |
| C | 1.20273500  | 4.83408900  | -0.10712000 |
| H | 2.33915000  | 3.00178600  | -0.09020600 |
| C | -0.07274900 | 5.40329700  | -0.09881400 |
| H | -2.19160400 | 5.01905800  | -0.06868400 |
| H | 2.08270300  | 5.46952900  | -0.12704900 |
| H | -0.18682300 | 6.48289900  | -0.11403500 |
| C | 2.83549200  | -1.34436800 | -0.26848600 |
| C | 2.97084000  | -2.70917500 | -0.55265600 |
| C | 3.97913400  | -0.57165500 | -0.04450800 |
| C | 4.23309200  | -3.29209800 | -0.59354000 |
| H | 2.09294900  | -3.31026800 | -0.76816500 |
| C | 5.23852400  | -1.16597800 | -0.09829800 |
| H | 3.87419800  | 0.48555600  | 0.16645700  |

|   |            |             |             |
|---|------------|-------------|-------------|
| C | 5.37624900 | -2.52615500 | -0.36563100 |
| H | 4.32158200 | -4.35039900 | -0.82038200 |
| H | 6.11897800 | -0.55557200 | 0.08030700  |
| H | 6.35987200 | -2.98300800 | -0.40394900 |

**$\gamma$ -TS2/4(SR)**

|   |             |             |             |
|---|-------------|-------------|-------------|
| C | 0.22717500  | 0.49694600  | 1.66999800  |
| H | 0.97145700  | 0.85188700  | 2.37266700  |
| C | -0.24134900 | -0.80967500 | 1.85228900  |
| C | 0.93288500  | -1.72835800 | 1.71820900  |
| H | 0.58694100  | -2.75224900 | 1.54069200  |
| C | -0.66677500 | 1.59922700  | 1.16981500  |
| O | -0.38071500 | 2.75599100  | 1.77332600  |
| O | -1.52031800 | 1.47160300  | 0.32041900  |
| C | -1.07710500 | 3.92064600  | 1.28812200  |
| C | -2.44790200 | 4.04405300  | 1.92368200  |
| H | -1.13841200 | 3.85983800  | 0.19750900  |
| H | -0.43204100 | 4.75650800  | 1.56505100  |
| H | -2.92900300 | 4.96370700  | 1.57741000  |
| H | -3.08223000 | 3.19833500  | 1.64742200  |
| H | -2.36529400 | 4.08803700  | 3.01346800  |
| C | 1.88174500  | -1.70570900 | 2.91834900  |
| H | 2.26389900  | -0.69622100 | 3.09568200  |
| H | 1.35862900  | -2.04504500 | 3.81607600  |
| H | 2.74363100  | -2.35614300 | 2.74951700  |
| C | -1.28472800 | -1.50949500 | -0.27866500 |



|   |             |             |             |
|---|-------------|-------------|-------------|
| C | -2.37675400 | -1.82291900 | -1.04591200 |
| C | -3.67969800 | -1.80904200 | -0.48302800 |
| C | -3.76396000 | -1.48309300 | 0.89721500  |
| C | -2.62409900 | -1.19435900 | 1.60304400  |
| N | -1.39740300 | -1.20103300 | 1.03880500  |
| H | -0.27996200 | -1.48143000 | -0.69395500 |
| H | -2.20819000 | -2.05580100 | -2.08871300 |
| H | -4.71047500 | -1.44857500 | 1.41950300  |
| H | -2.64263300 | -0.93784300 | 2.65534900  |
| N | -4.77473200 | -2.08862300 | -1.21655800 |
| C | -4.64812600 | -2.34439400 | -2.64454800 |
| H | -4.17301600 | -1.49939600 | -3.15422700 |
| H | -4.06105700 | -3.24944300 | -2.83604800 |
| H | -5.64132100 | -2.48318400 | -3.06798600 |
| C | -6.09023700 | -2.08679900 | -0.59491700 |
| H | -6.83115500 | -2.39401200 | -1.33137800 |
| H | -6.12866300 | -2.79333000 | 0.24133600  |
| H | -6.35741800 | -1.08838400 | -0.22913800 |
| C | 1.28482300  | 0.55678600  | -0.97283800 |
| N | 1.61994800  | -1.25476100 | 0.44620000  |
| N | 1.54142300  | 0.14972700  | 0.30635000  |
| O | 1.13124700  | -0.17956000 | -1.95308200 |
| C | 1.29168800  | 2.05351400  | -1.14545700 |
| C | 0.64621500  | 2.59666200  | -2.26070200 |
| C | 1.94919400  | 2.90364800  | -0.25060600 |

|   |            |             |             |
|---|------------|-------------|-------------|
| C | 0.64622000 | 3.97210100  | -2.47311400 |
| H | 0.15095700 | 1.92155600  | -2.95175000 |
| C | 1.95843100 | 4.28111600  | -0.46957900 |
| H | 2.46207800 | 2.47723900  | 0.60613700  |
| C | 1.30534800 | 4.81782900  | -1.57804800 |
| H | 0.14003700 | 4.38721400  | -3.33981800 |
| H | 2.48204700 | 4.93354900  | 0.22350000  |
| H | 1.31573200 | 5.89037500  | -1.75011400 |
| C | 2.81975400 | -1.85657500 | 0.06269300  |
| C | 3.00432200 | -3.24010900 | 0.26865300  |
| C | 3.84790000 | -1.14609100 | -0.58309800 |
| C | 4.17090000 | -3.87350500 | -0.14158900 |
| H | 2.22725300 | -3.82674700 | 0.74775400  |
| C | 5.01158700 | -1.79560600 | -0.98760700 |
| H | 3.73446000 | -0.08519500 | -0.76897900 |
| C | 5.19101500 | -3.16003800 | -0.77272100 |
| H | 4.27968900 | -4.94047100 | 0.03350800  |
| H | 5.78702600 | -1.21804500 | -1.48349700 |
| H | 6.09984000 | -3.65874600 | -1.09368900 |

**$\gamma$ -4(SR)**

|   |             |             |             |
|---|-------------|-------------|-------------|
| C | 0.26982100  | 0.36552900  | 0.28697200  |
| H | 0.16708600  | 0.80865500  | 1.28939200  |
| C | -0.59678800 | -0.82229400 | 0.04938600  |
| C | 0.21328500  | -2.05555500 | -0.15157700 |
| H | -0.13626600 | -2.65639500 | -1.00289100 |

|   |             |             |             |
|---|-------------|-------------|-------------|
| C | 0.02341500  | 1.49231800  | -0.74707400 |
| O | -0.43300100 | 2.60193400  | -0.15453300 |
| O | 0.21951100  | 1.37766500  | -1.93148100 |
| C | -0.72281200 | 3.72092700  | -1.01772400 |
| C | -2.10279400 | 3.58367400  | -1.62990000 |
| H | 0.05498900  | 3.78057900  | -1.78305000 |
| H | -0.65443900 | 4.59296600  | -0.36502500 |
| H | -2.31161000 | 4.45056300  | -2.26390800 |
| H | -2.16804500 | 2.68367200  | -2.24690200 |
| H | -2.86946900 | 3.53738000  | -0.85070400 |
| C | 0.26377200  | -2.92520800 | 1.11846600  |
| H | 0.78269100  | -2.38622700 | 1.91771900  |
| H | -0.75155900 | -3.14520700 | 1.46414300  |
| H | 0.78009600  | -3.87419800 | 0.94636900  |
| C | -2.70480100 | -1.94539900 | -0.02839400 |
| C | -4.08256500 | -1.92995600 | 0.05836500  |
| C | -4.79728400 | -0.77789600 | 0.40683100  |
| C | -4.00187000 | 0.34899600  | 0.67059400  |
| C | -2.63324400 | 0.32769400  | 0.56528000  |
| N | -1.93124900 | -0.81496200 | 0.19043800  |
| H | -2.16848000 | -2.83912300 | -0.30885800 |
| H | -4.58481700 | -2.86652200 | -0.15422900 |
| H | -4.45162300 | 1.28263500  | 0.99351500  |
| H | -2.03896300 | 1.20367100  | 0.78092200  |
| N | -6.20204300 | -0.72506300 | 0.55179300  |

|   |             |             |             |
|---|-------------|-------------|-------------|
| C | -6.89120900 | -1.99412400 | 0.41633700  |
| H | -6.82845700 | -2.41119100 | -0.60460400 |
| H | -6.48185400 | -2.72351500 | 1.12015300  |
| H | -7.94670100 | -1.84630100 | 0.65697200  |
| C | -6.86166100 | 0.32546100  | -0.21762300 |
| H | -6.84532800 | 0.11374800  | -1.30029000 |
| H | -7.90221500 | 0.40591300  | 0.10811100  |
| H | -6.38344600 | 1.29106500  | -0.04943400 |
| C | 2.65294900  | 0.61004700  | -0.32909300 |
| N | 1.52536600  | -1.47974900 | -0.54370800 |
| N | 1.62158100  | -0.20901200 | 0.12031500  |
| O | 3.50779100  | 0.22885800  | -1.10517100 |
| C | 2.67945800  | 1.98083000  | 0.28021900  |
| C | 2.98000500  | 3.06432300  | -0.54936900 |
| C | 2.43401700  | 2.18682100  | 1.64025500  |
| C | 3.00123000  | 4.35361700  | -0.02434600 |
| H | 3.18361100  | 2.88369400  | -1.60088800 |
| C | 2.47367900  | 3.47617300  | 2.16584100  |
| H | 2.22396400  | 1.33822100  | 2.28625300  |
| C | 2.74578700  | 4.56028400  | 1.33222300  |
| H | 3.22304200  | 5.19718200  | -0.67105800 |
| H | 2.29362000  | 3.63470200  | 3.22459400  |
| H | 2.76888100  | 5.56601900  | 1.74113900  |
| C | 2.62887300  | -2.35533700 | -0.31661000 |
| C | 2.71878900  | -3.46207500 | -1.16666000 |

|   |            |             |             |
|---|------------|-------------|-------------|
| C | 3.57359200 | -2.18688100 | 0.69734900  |
| C | 3.72583500 | -4.40425200 | -0.98822400 |
| H | 1.99900200 | -3.56544800 | -1.97354300 |
| C | 4.59084900 | -3.12709600 | 0.85889700  |
| H | 3.52131400 | -1.32428600 | 1.35382300  |
| C | 4.66986600 | -4.24164600 | 0.02669600  |
| H | 3.78296100 | -5.25899800 | -1.65562600 |
| H | 5.32714000 | -2.98338800 | 1.64419700  |
| H | 5.46374000 | -4.96986600 | 0.15861800  |

**$\gamma$ -TS2/5(SR)**

|   |             |             |             |
|---|-------------|-------------|-------------|
| C | 0.86692400  | -1.30016600 | -0.89066000 |
| H | 1.73733600  | -1.18641200 | -1.53417500 |
| C | -0.28992000 | -0.69600700 | -1.42761300 |
| C | -0.12898700 | 0.75622800  | -1.81509100 |
| H | -1.08666000 | 1.11707600  | -2.19804800 |
| C | 0.75890400  | -2.71222700 | -0.37301200 |
| O | 1.71933200  | -3.48697100 | -0.89148300 |
| O | -0.07959700 | -3.11897400 | 0.40026800  |
| C | 0.90962600  | 1.01593700  | -2.90840300 |
| H | 0.62314000  | 0.47963200  | -3.81676000 |
| H | 0.95473300  | 2.08758400  | -3.12836400 |
| H | 1.91532700  | 0.69972000  | -2.62248100 |
| C | -1.59055800 | -0.62284800 | 0.67674400  |
| C | -2.76671500 | -0.70882900 | 1.37996800  |
| C | -3.97452800 | -1.04531900 | 0.71714500  |

|   |             |             |             |
|---|-------------|-------------|-------------|
| C | -3.88106400 | -1.27516800 | -0.68234000 |
| C | -2.66452100 | -1.18594200 | -1.31042000 |
| N | -1.52688000 | -0.86504700 | -0.65629500 |
| H | -0.64802700 | -0.36584700 | 1.14322400  |
| H | -2.73713300 | -0.51009900 | 2.44263100  |
| H | -4.74475300 | -1.54123700 | -1.27637400 |
| H | -2.54237600 | -1.37346700 | -2.37100300 |
| N | -5.14660400 | -1.14735600 | 1.37654700  |
| C | -5.19768100 | -0.91066600 | 2.81225400  |
| H | -4.54320700 | -1.60568800 | 3.34982600  |
| H | -4.90108000 | 0.11601800  | 3.05474700  |
| H | -6.21858000 | -1.06363700 | 3.15884000  |
| C | -6.36095800 | -1.50013700 | 0.65699300  |
| H | -6.59153000 | -0.76166000 | -0.11908300 |
| H | -6.27182000 | -2.48818100 | 0.19140400  |
| H | -7.19178200 | -1.52723400 | 1.35989000  |
| C | 2.03253000  | 0.61758200  | 0.31615900  |
| N | 0.14058400  | 1.59038800  | -0.59979400 |
| N | 1.48829100  | 1.66528500  | -0.19991600 |
| O | 1.48522300  | -0.57846900 | 0.50771500  |
| C | 3.44852400  | 0.75112600  | 0.78443400  |
| C | 4.10106400  | -0.35787700 | 1.33062800  |
| C | 4.13571700  | 1.96860700  | 0.68877400  |
| C | 5.41854700  | -0.25234700 | 1.77668000  |
| H | 3.56578200  | -1.29857400 | 1.40282800  |

|   |             |             |             |
|---|-------------|-------------|-------------|
| C | 5.44889900  | 2.07141700  | 1.13421200  |
| H | 3.62999000  | 2.82487300  | 0.25559100  |
| C | 6.09568400  | 0.96079400  | 1.68116600  |
| H | 5.91417900  | -1.12094000 | 2.20038900  |
| H | 5.97154400  | 3.02007000  | 1.05292400  |
| H | 7.12184500  | 1.04281800  | 2.02739600  |
| C | -0.51332600 | 2.83904300  | -0.52649500 |
| C | -1.90665000 | 2.89499800  | -0.72113500 |
| C | 0.15995800  | 4.02745300  | -0.20204300 |
| C | -2.58888600 | 4.10358900  | -0.63750900 |
| H | -2.46172900 | 1.97978300  | -0.91104700 |
| C | -0.53709300 | 5.23094700  | -0.11667600 |
| H | 1.22536800  | 3.99460300  | -0.01627500 |
| C | -1.91112400 | 5.28669200  | -0.33972300 |
| H | -3.66438700 | 4.11562000  | -0.79185300 |
| H | 0.00981600  | 6.13761700  | 0.12754200  |
| H | -2.44633400 | 6.22831400  | -0.26983200 |
| C | 1.69754200  | -4.87024100 | -0.49722200 |
| C | 2.85974000  | -5.55392600 | -1.17981400 |
| H | 0.73679000  | -5.30205500 | -0.79457500 |
| H | 1.77195500  | -4.92565400 | 0.59290500  |
| H | 2.87081900  | -6.61383400 | -0.91029600 |
| H | 2.77425400  | -5.47437900 | -2.26685300 |
| H | 3.80922700  | -5.10870400 | -0.87091500 |

**$\gamma$ -5(SR)**

|   |             |             |             |
|---|-------------|-------------|-------------|
| C | 0.82422300  | -1.40675500 | -0.74732200 |
| H | 1.63909200  | -1.46556400 | -1.47409200 |
| C | -0.31485700 | -0.72261800 | -1.36598700 |
| C | -0.00071200 | 0.69016900  | -1.77569800 |
| H | -0.91589600 | 1.14751300  | -2.16146800 |
| C | 0.47168100  | -2.80989700 | -0.29617200 |
| O | 0.91788100  | -3.73083700 | -1.15812400 |
| O | -0.16127700 | -3.07922700 | 0.70064100  |
| C | 0.53845000  | -5.09036300 | -0.88267900 |
| C | 1.11396000  | -5.95256600 | -1.98256000 |
| H | -0.55395300 | -5.14835100 | -0.84733000 |
| H | 0.92498300  | -5.37171400 | 0.10177500  |
| H | 0.84498800  | -6.99826200 | -1.80811200 |
| H | 0.72279700  | -5.65087400 | -2.95786300 |
| H | 2.20445700  | -5.87656100 | -2.00579400 |
| C | 1.06075600  | 0.81622200  | -2.87060300 |
| H | 0.71511300  | 0.30527900  | -3.77247800 |
| H | 1.23307100  | 1.87271800  | -3.10320500 |
| H | 2.02201300  | 0.38354200  | -2.58013200 |
| C | -1.53670500 | -0.42096900 | 0.80022500  |
| C | -2.69387000 | -0.34341000 | 1.53755300  |
| C | -3.95311300 | -0.53402900 | 0.91687300  |
| C | -3.92669200 | -0.82100700 | -0.47401600 |
| C | -2.72556800 | -0.90574700 | -1.13387900 |
| N | -1.53398400 | -0.70412000 | -0.52713800 |



|   |             |             |             |
|---|-------------|-------------|-------------|
| H | -0.56535500 | -0.27263100 | 1.24915900  |
| H | -2.60748900 | -0.12844200 | 2.59398600  |
| H | -4.83297300 | -1.00091200 | -1.03656500 |
| H | -2.65703500 | -1.14828900 | -2.18779800 |
| N | -5.11025900 | -0.45221900 | 1.60794500  |
| C | -5.08517700 | -0.18090500 | 3.03752600  |
| H | -4.54916600 | -0.96702200 | 3.58175500  |
| H | -4.60837500 | 0.78277800  | 3.24753300  |
| H | -6.10864500 | -0.14333200 | 3.40730600  |
| C | -6.37940800 | -0.68363700 | 0.93661600  |
| H | -6.53441100 | 0.03594700  | 0.12490200  |
| H | -6.43405600 | -1.69862900 | 0.52592200  |
| H | -7.18621900 | -0.56204400 | 1.65763800  |
| C | 2.11708500  | 0.37001200  | 0.33989800  |
| N | 0.36704200  | 1.56659200  | -0.59242100 |
| N | 1.68090600  | 1.47239500  | -0.14077800 |
| O | 1.44204300  | -0.79482400 | 0.48398900  |
| C | 3.49872100  | 0.33422200  | 0.89798700  |
| C | 4.01341100  | -0.86254400 | 1.40690600  |
| C | 4.29602300  | 1.48723800  | 0.92503400  |
| C | 5.30333700  | -0.90621200 | 1.93485900  |
| H | 3.39558000  | -1.75351700 | 1.39109400  |
| C | 5.58071000  | 1.44001600  | 1.45286700  |
| H | 3.89512200  | 2.41336400  | 0.52721600  |
| C | 6.09074000  | 0.24210000  | 1.95991400  |

|   |             |             |             |
|---|-------------|-------------|-------------|
| H | 5.69108400  | -1.84159600 | 2.32723900  |
| H | 6.18865200  | 2.33965300  | 1.46825200  |
| H | 7.09550300  | 0.20695200  | 2.37035700  |
| C | -0.06917700 | 2.91269000  | -0.67933300 |
| C | -1.44630000 | 3.15522600  | -0.81848900 |
| C | 0.80026600  | 4.00875000  | -0.59658800 |
| C | -1.93270400 | 4.45461800  | -0.90842000 |
| H | -2.13663300 | 2.31505700  | -0.82977300 |
| C | 0.30039100  | 5.30768900  | -0.67978900 |
| H | 1.86043000  | 3.83289900  | -0.46447100 |
| C | -1.06284700 | 5.54416300  | -0.84298200 |
| H | -3.00181100 | 4.61635700  | -1.01412400 |
| H | 0.99239900  | 6.14321000  | -0.61965600 |
| H | -1.44413900 | 6.55831400  | -0.90701300 |

**$\alpha$ -TS1/2(R)**

|   |             |             |            |
|---|-------------|-------------|------------|
| C | -0.80652700 | -0.72005100 | 1.03586000 |
| H | -1.71654200 | -0.37010700 | 1.50587700 |
| C | 0.36308200  | 0.04119700  | 1.35382200 |
| C | 0.37630200  | 1.25546800  | 1.95312400 |
| H | 1.31609200  | 1.80665900  | 1.93272000 |
| C | -0.77990900 | -2.16748000 | 0.83137100 |
| O | -1.96154300 | -2.71839500 | 1.17800600 |
| O | 0.13294400  | -2.83093700 | 0.36121500 |
| C | -2.13104300 | -4.10265100 | 0.85778700 |
| C | -3.53840500 | -4.47907900 | 1.26733900 |

|   |             |             |             |
|---|-------------|-------------|-------------|
| H | -1.37194000 | -4.68813700 | 1.38664600  |
| H | -1.97037300 | -4.23557800 | -0.21762700 |
| H | -4.26128300 | -3.85145800 | 0.73907200  |
| H | -3.73370900 | -5.52702400 | 1.02308700  |
| H | -3.67727200 | -4.33979100 | 2.34272200  |
| C | -0.75340800 | 1.90917900  | 2.68623000  |
| H | -1.67469600 | 1.32721800  | 2.64666400  |
| H | -0.48393300 | 2.06353300  | 3.73846900  |
| H | -0.96099400 | 2.89387600  | 2.25442300  |
| C | 1.72907100  | -0.78512800 | -0.49022700 |
| C | 2.92236900  | -1.20959300 | -1.01835600 |
| C | 4.07598000  | -1.30814800 | -0.20764300 |
| C | 3.92334000  | -0.96576600 | 1.16392300  |
| C | 2.70461200  | -0.54742200 | 1.62578500  |
| N | 1.62865800  | -0.43853000 | 0.81575900  |
| H | 0.82457700  | -0.66576700 | -1.07514700 |
| H | 2.94150200  | -1.45748200 | -2.06996700 |
| H | 4.74111600  | -1.03721600 | 1.86704600  |
| H | 2.53339700  | -0.29237000 | 2.66434100  |
| N | 5.26598100  | -1.71497900 | -0.70479000 |
| C | 5.37836400  | -2.07184100 | -2.11131100 |
| H | 4.72676100  | -2.91739700 | -2.35833000 |
| H | 5.11641600  | -1.22389500 | -2.75308500 |
| H | 6.40766500  | -2.35685300 | -2.32268400 |
| C | 6.42487900  | -1.82021800 | 0.16694700  |

|   |             |             |             |
|---|-------------|-------------|-------------|
| H | 6.66087900  | -0.85460800 | 0.62794400  |
| H | 6.26263400  | -2.56091800 | 0.95858400  |
| H | 7.28452400  | -2.13361700 | -0.42291000 |
| C | -0.19848300 | 2.09300400  | -0.79961800 |
| N | -1.27475900 | 0.12676500  | -0.80752100 |
| N | -1.36930600 | 1.41183500  | -0.53702000 |
| O | 0.84544200  | 1.63089700  | -1.27241000 |
| C | -0.28698600 | 3.56521100  | -0.48777800 |
| C | -1.47437700 | 4.17651900  | -0.07027900 |
| C | 0.87088600  | 4.33671500  | -0.61875500 |
| C | -1.49721400 | 5.54022100  | 0.21576400  |
| H | -2.36899300 | 3.57006700  | 0.02204400  |
| C | 0.84885200  | 5.69812200  | -0.32766500 |
| H | 1.77744800  | 3.84264600  | -0.95451300 |
| C | -0.33630300 | 6.30332500  | 0.09148700  |
| H | -2.42339000 | 6.00902500  | 0.53532900  |
| H | 1.75440100  | 6.28936400  | -0.42897400 |
| H | -0.35580600 | 7.36547300  | 0.31745400  |
| C | -2.55339400 | -0.49972100 | -0.95568400 |
| C | -2.56414000 | -1.71922400 | -1.63773700 |
| C | -3.75345100 | 0.04700400  | -0.49023200 |
| C | -3.76222800 | -2.39732200 | -1.84239700 |
| H | -1.61968900 | -2.11816800 | -2.00000000 |
| C | -4.94774100 | -0.63760000 | -0.69474600 |
| H | -3.72745900 | 1.00528800  | 0.01753600  |

|   |             |             |             |
|---|-------------|-------------|-------------|
| C | -4.95947400 | -1.85990900 | -1.36957800 |
| H | -3.76293700 | -3.34227400 | -2.37882900 |
| H | -5.87869600 | -0.21329300 | -0.32983600 |
| H | -5.89638300 | -2.38424100 | -1.53213500 |

**$\alpha$ -2(R)**

|   |             |             |             |
|---|-------------|-------------|-------------|
| C | 0.30705000  | 1.15738100  | 1.22601600  |
| H | 1.22810200  | 1.51449200  | 1.69957600  |
| C | -0.25785900 | 0.05586300  | 2.09868500  |
| C | 0.20864900  | -0.37307900 | 3.27069600  |
| H | -0.29340300 | -1.23263100 | 3.71481900  |
| C | -0.60337800 | 2.38803300  | 1.19800300  |
| O | -0.13770600 | 3.30910700  | 0.37040700  |
| O | -1.59700500 | 2.51559900  | 1.88358100  |
| C | -0.95909900 | 4.47454300  | 0.16293100  |
| C | -0.35865200 | 5.23930100  | -0.99330900 |
| H | -0.97424000 | 5.05968600  | 1.08761200  |
| H | -1.97927300 | 4.14198700  | -0.05288600 |
| H | -0.35531900 | 4.62493500  | -1.89786600 |
| H | -0.94850700 | 6.14037700  | -1.18427100 |
| H | 0.66895400  | 5.53780900  | -0.77037800 |
| C | 1.35658700  | 0.18816600  | 4.04717700  |
| H | 2.09898100  | -0.59648100 | 4.22400500  |
| H | 1.85637000  | 1.01877000  | 3.54717300  |
| H | 1.01133700  | 0.53411000  | 5.02735800  |
| C | -1.15492100 | -1.58937900 | 0.55536900  |

|   |             |             |             |
|---|-------------|-------------|-------------|
| C | -2.19560200 | -2.22405600 | -0.06956100 |
| C | -3.54079900 | -1.90694600 | 0.25850400  |
| C | -3.73443600 | -0.93688800 | 1.28598200  |
| C | -2.65433700 | -0.33784900 | 1.87474000  |
| N | -1.38516600 | -0.65138100 | 1.51304600  |
| H | -0.10245200 | -1.75876400 | 0.29656200  |
| H | -1.95225000 | -2.94864000 | -0.83458700 |
| H | -4.72212300 | -0.63935200 | 1.61071700  |
| H | -2.74944900 | 0.42885800  | 2.63376800  |
| N | -4.57683200 | -2.48538600 | -0.37092900 |
| C | -4.33301000 | -3.43085200 | -1.45442600 |
| H | -3.75349200 | -2.96375100 | -2.25768800 |
| H | -3.79514600 | -4.31351600 | -1.09241300 |
| H | -5.28925700 | -3.75471800 | -1.86098800 |
| C | -5.94392400 | -2.12867200 | -0.01610600 |
| H | -6.14182400 | -2.33738900 | 1.04050900  |
| H | -6.13953400 | -1.06889100 | -0.21481300 |
| H | -6.63031800 | -2.72443100 | -0.61512300 |
| C | 2.46197500  | -0.81729700 | -0.20028600 |
| N | 0.73018100  | 0.66770100  | -0.06560600 |
| N | 2.13463700  | 0.46944200  | -0.13189100 |
| O | 1.70312400  | -1.82038200 | -0.22827400 |
| C | 3.95736800  | -1.05824500 | -0.26877200 |
| C | 4.88770100  | -0.01741500 | -0.37111700 |
| C | 4.41504900  | -2.37734000 | -0.23382100 |

|   |             |             |             |
|---|-------------|-------------|-------------|
| C | 6.25162000  | -0.29714400 | -0.43156800 |
| H | 4.52745700  | 1.00545400  | -0.40625200 |
| C | 5.77930500  | -2.65817800 | -0.29113600 |
| H | 3.67826700  | -3.17116800 | -0.16320400 |
| C | 6.70208500  | -1.61762500 | -0.39048400 |
| H | 6.96643900  | 0.51697300  | -0.51392200 |
| H | 6.12223800  | -3.68873200 | -0.26149500 |
| H | 7.76588500  | -1.83305200 | -0.43799900 |
| C | -0.00585300 | 0.76467400  | -1.23128600 |
| C | -1.39291000 | 1.03761800  | -1.24202800 |
| C | 0.62118000  | 0.54013900  | -2.47593200 |
| C | -2.09906400 | 1.11251100  | -2.43908500 |
| H | -1.94790200 | 1.16667100  | -0.31799600 |
| C | -0.10166500 | 0.61591800  | -3.65983300 |
| H | 1.67939700  | 0.31190400  | -2.49311600 |
| C | -1.46759700 | 0.90645700  | -3.66431000 |
| H | -3.16425000 | 1.32838600  | -2.40222300 |
| H | 0.41829100  | 0.44221400  | -4.59830000 |
| H | -2.02280800 | 0.96384100  | -4.59489200 |

**$\alpha$ -TS2/P(R)**

|   |            |             |            |
|---|------------|-------------|------------|
| C | 0.27250100 | 0.92448200  | 0.88185200 |
| H | 1.10151700 | 1.47804000  | 1.34735000 |
| C | 0.18390000 | -0.43032000 | 1.58094400 |
| C | 0.04901600 | -0.41069300 | 2.96159200 |
| H | 0.09407200 | -1.36837500 | 3.47329900 |

|   |             |             |             |
|---|-------------|-------------|-------------|
| C | -0.99063600 | 1.76376200  | 1.05317000  |
| O | -0.67190800 | 3.03602300  | 1.28780400  |
| O | -2.12611400 | 1.35765100  | 0.96003300  |
| C | -1.76793300 | 3.96685000  | 1.34841800  |
| C | -1.17340700 | 5.34979900  | 1.47837400  |
| H | -2.40018200 | 3.70577400  | 2.20305200  |
| H | -2.36147800 | 3.86053100  | 0.43476800  |
| H | -0.53290400 | 5.57406100  | 0.62080100  |
| H | -1.97538400 | 6.09258400  | 1.51607000  |
| H | -0.57976000 | 5.43460700  | 2.39257700  |
| C | 0.10643400  | 0.85068500  | 3.79205000  |
| H | 0.14554700  | 0.57606500  | 4.85097900  |
| H | 0.98994000  | 1.48541300  | 3.61292200  |
| H | -0.77261000 | 1.51048600  | 3.69315700  |
| C | -0.81519600 | -1.84260700 | -0.43498200 |
| C | -1.83412700 | -2.50078600 | -1.08042100 |
| C | -3.08659500 | -2.67894400 | -0.43629200 |
| C | -3.19881700 | -2.14343900 | 0.87130000  |
| C | -2.13228500 | -1.48337900 | 1.43358300  |
| N | -0.95578600 | -1.33860200 | 0.80838100  |
| H | 0.14478000  | -1.71627100 | -0.91578600 |
| H | -1.64708000 | -2.88077700 | -2.07591400 |
| H | -4.11548300 | -2.21737100 | 1.44080900  |
| H | -2.16008100 | -1.02759800 | 2.42016200  |
| N | -4.11147200 | -3.32015500 | -1.03956600 |



|   |             |             |             |
|---|-------------|-------------|-------------|
| C | -3.96858600 | -3.79575500 | -2.40699300 |
| H | -3.74195000 | -2.97119900 | -3.09285200 |
| H | -3.17489400 | -4.54716100 | -2.48385500 |
| H | -4.90406000 | -4.25576100 | -2.72197500 |
| C | -5.38741600 | -3.45562700 | -0.35451100 |
| H | -5.26506800 | -3.97224500 | 0.60339100  |
| H | -5.84934000 | -2.47765100 | -0.17265500 |
| H | -6.06079100 | -4.04667900 | -0.97357100 |
| C | 2.15603000  | -0.76428100 | 0.07273400  |
| N | 0.56995800  | 0.73694800  | -0.55236300 |
| N | 1.84162300  | 0.18698700  | -0.73650000 |
| O | 1.38698400  | -1.25566000 | 1.04236200  |
| C | 3.48064600  | -1.42442200 | -0.06776600 |
| C | 4.27694100  | -1.17498000 | -1.19218000 |
| C | 3.93890700  | -2.29599300 | 0.92399400  |
| C | 5.51680000  | -1.79127000 | -1.31936000 |
| H | 3.91272900  | -0.49617200 | -1.95646200 |
| C | 5.18538500  | -2.90777600 | 0.79367200  |
| H | 3.31710700  | -2.48550000 | 1.79261200  |
| C | 5.97605200  | -2.65880300 | -0.32601000 |
| H | 6.12754400  | -1.59326200 | -2.19523800 |
| H | 5.53762700  | -3.58005900 | 1.57032700  |
| H | 6.94561600  | -3.13749500 | -0.42703600 |
| C | 0.39300100  | 1.91214600  | -1.35892100 |
| C | -0.87800600 | 2.16690400  | -1.87671700 |

|   |             |            |             |
|---|-------------|------------|-------------|
| C | 1.44207200  | 2.79853300 | -1.61186400 |
| C | -1.10818800 | 3.32514300 | -2.61664100 |
| H | -1.67400600 | 1.45109800 | -1.69446700 |
| C | 1.20814600  | 3.94681600 | -2.36496800 |
| H | 2.42954300  | 2.57751700 | -1.21994100 |
| C | -0.06686600 | 4.21978400 | -2.86146600 |
| H | -2.09983900 | 3.51857900 | -3.01538500 |
| H | 2.02539000  | 4.63535100 | -2.55909700 |
| H | -0.24508400 | 5.11813200 | -3.44482300 |

**$\alpha$ -P(R)**

|   |             |             |             |
|---|-------------|-------------|-------------|
| C | -1.07563800 | -0.43710600 | 0.59084600  |
| H | -1.95258600 | -0.36747400 | 1.23619600  |
| C | -0.12721800 | -1.44643200 | 1.18654200  |
| C | -0.42258400 | -2.42077400 | 2.04453300  |
| H | 0.40612900  | -3.06031000 | 2.34179100  |
| C | -1.52645000 | -0.92310500 | -0.79638900 |
| O | -2.48393300 | -1.84510400 | -0.67808500 |
| O | -1.06126700 | -0.53838600 | -1.83940100 |
| C | -2.94796000 | -2.44328700 | -1.90802600 |
| C | -3.99798700 | -3.46513800 | -1.54221700 |
| H | -2.09101900 | -2.89662900 | -2.41472600 |
| H | -3.34699600 | -1.65163000 | -2.54873400 |
| H | -4.83864200 | -2.99333300 | -1.02645800 |
| H | -4.37518500 | -3.94271100 | -2.45062800 |
| H | -3.57807800 | -4.23922000 | -0.89421700 |

|   |             |             |             |
|---|-------------|-------------|-------------|
| C | -1.77414800 | -2.74598900 | 2.59942400  |
| H | -2.52897100 | -1.99228400 | 2.36697200  |
| H | -2.13039400 | -3.70124400 | 2.19705700  |
| H | -1.72270500 | -2.85310800 | 3.68730500  |
| C | 1.61271900  | -0.14094700 | 0.29497900  |
| N | -0.42564400 | 0.84816900  | 0.52939100  |
| N | 0.90147100  | 0.91427000  | 0.22044500  |
| O | 1.15882300  | -1.36633900 | 0.69374400  |
| C | 3.04614500  | -0.12872600 | -0.05548700 |
| C | 3.61416500  | 1.01399400  | -0.63322200 |
| C | 3.84594100  | -1.24918000 | 0.19012600  |
| C | 4.96700200  | 1.03418900  | -0.94990100 |
| H | 2.98407000  | 1.87361200  | -0.83679200 |
| C | 5.20147700  | -1.22321300 | -0.13317200 |
| H | 3.40820400  | -2.13640300 | 0.63391800  |
| C | 5.76626800  | -0.08374500 | -0.70051000 |
| H | 5.39980800  | 1.92301800  | -1.39871100 |
| H | 5.81520400  | -2.09715700 | 0.06313400  |
| H | 6.82238200  | -0.06563300 | -0.95192400 |
| C | -1.17018300 | 2.02372100  | 0.35099800  |
| C | -0.51968200 | 3.26788600  | 0.32584800  |
| C | -2.56641800 | 1.98292900  | 0.22344100  |
| C | -1.25809100 | 4.43553900  | 0.18394000  |
| H | 0.55843000  | 3.30318800  | 0.42085900  |
| C | -3.29128800 | 3.16625100  | 0.09037300  |

|   |             |            |             |
|---|-------------|------------|-------------|
| H | -3.10587700 | 1.04202600 | 0.21143200  |
| C | -2.64910100 | 4.39986300 | 0.06891900  |
| H | -0.73632700 | 5.38809900 | 0.16769300  |
| H | -4.37136000 | 3.11082800 | -0.00924700 |
| H | -3.21767800 | 5.31752600 | -0.04013600 |

**$\alpha$ -TS1/2(S)**

|   |             |             |            |
|---|-------------|-------------|------------|
| C | -0.21198200 | 0.40083500  | 1.70898000 |
| H | -1.27586000 | 0.40591700  | 1.91205800 |
| C | 0.50862300  | -0.81288600 | 2.03871100 |
| C | 0.14404600  | -1.77882900 | 2.89674200 |
| H | 0.73171400  | -2.69441500 | 2.91813000 |
| C | 0.44964300  | 1.66543000  | 1.68426900 |
| O | -0.42627700 | 2.70131700  | 1.58404800 |
| O | 1.66907300  | 1.85943100  | 1.70481700 |
| C | 0.15194100  | 3.99281100  | 1.38724600 |
| C | -0.98649600 | 4.97670700  | 1.23054700 |
| H | 0.78981500  | 3.96987800  | 0.49658600 |
| H | 0.78350500  | 4.24322900  | 2.24696800 |
| H | -0.58885900 | 5.98153500  | 1.05760600 |
| H | -1.61755500 | 4.70102500  | 0.38070300 |
| H | -1.60837700 | 5.00040700  | 2.13023700 |
| C | -1.09582200 | -1.71026400 | 3.72965800 |
| H | -1.29383900 | -0.69207700 | 4.07797200 |
| H | -1.96285200 | -2.03186400 | 3.13549100 |
| H | -1.02555900 | -2.36658800 | 4.60078000 |

|   |             |             |             |
|---|-------------|-------------|-------------|
| C | 2.91781100  | -0.68110000 | 1.52505700  |
| C | 4.00259600  | -0.98401400 | 0.74158700  |
| C | 3.83715300  | -1.76176500 | -0.43716500 |
| C | 2.51687400  | -2.19880500 | -0.73281600 |
| C | 1.47783300  | -1.85812300 | 0.09444200  |
| N | 1.67897200  | -1.11403300 | 1.20915700  |
| H | 2.99037500  | -0.07437800 | 2.41753100  |
| H | 4.96937900  | -0.60649500 | 1.04421100  |
| H | 2.29384000  | -2.79207100 | -1.60891200 |
| H | 0.44344600  | -2.13516700 | -0.08428900 |
| N | 4.87918800  | -2.06614100 | -1.23451600 |
| C | 6.22023700  | -1.62134000 | -0.88297200 |
| H | 6.27997900  | -0.52764600 | -0.85457800 |
| H | 6.52378300  | -2.01893200 | 0.09179600  |
| H | 6.92143200  | -1.98440000 | -1.63249200 |
| C | 4.66822300  | -2.84067500 | -2.44980900 |
| H | 4.27489300  | -3.83763400 | -2.22159400 |
| H | 3.97314000  | -2.33090800 | -3.12560700 |
| H | 5.62101700  | -2.95772800 | -2.96315800 |
| C | -2.40989300 | -1.12298900 | -0.29385900 |
| N | -0.61953500 | 0.16919400  | -0.60423900 |
| N | -1.90337500 | 0.09614500  | -0.72722800 |
| O | -1.77167000 | -1.96920800 | 0.33094200  |
| C | -3.86339100 | -1.32519900 | -0.59754200 |
| C | -4.62700000 | -0.36549700 | -1.27226600 |

|                                 |             |             |             |
|---------------------------------|-------------|-------------|-------------|
| C                               | -4.46386500 | -2.52293000 | -0.19466100 |
| C                               | -5.97282200 | -0.60600800 | -1.54000600 |
| H                               | -4.15999200 | 0.56388300  | -1.57860800 |
| C                               | -5.80883600 | -2.76043100 | -0.46093600 |
| H                               | -3.85794700 | -3.25662700 | 0.32785300  |
| C                               | -6.56631900 | -1.80161200 | -1.13509300 |
| H                               | -6.56003100 | 0.14261400  | -2.06347000 |
| H                               | -6.26772900 | -3.69207900 | -0.14323900 |
| H                               | -7.61611400 | -1.98626200 | -1.34369100 |
| C                               | -0.08959300 | 1.38494800  | -1.12606200 |
| C                               | 1.30248000  | 1.46115100  | -1.25016000 |
| C                               | -0.88253000 | 2.45294000  | -1.57278200 |
| C                               | 1.89647900  | 2.57631000  | -1.83524700 |
| H                               | 1.90909600  | 0.63888000  | -0.88374700 |
| C                               | -0.28354200 | 3.56377400  | -2.15488700 |
| H                               | -1.95874500 | 2.38797200  | -1.46147900 |
| C                               | 1.10632300  | 3.62953800  | -2.29308100 |
| H                               | 2.97750300  | 2.62413200  | -1.92608300 |
| H                               | -0.90201200 | 4.38650500  | -2.50296400 |
| H                               | 1.56777400  | 4.49895500  | -2.75206900 |
| <b><math>\alpha</math>-2(S)</b> |             |             |             |
| C                               | 1.33637400  | 0.04913400  | 0.99768500  |
| H                               | 1.61773800  | 1.06761400  | 1.28857900  |
| C                               | 0.22297200  | -0.40358600 | 1.92580000  |
| C                               | 0.13320700  | -0.10615600 | 3.22264700  |

|   |             |             |             |
|---|-------------|-------------|-------------|
| H | -0.70444800 | -0.52542000 | 3.77868100  |
| C | 2.56653900  | -0.84104400 | 1.15318200  |
| O | 3.68565400  | -0.14062300 | 1.01562900  |
| O | 2.54036600  | -2.03623800 | 1.36936700  |
| C | 4.91521200  | -0.88983400 | 0.97492400  |
| C | 6.01497700  | 0.07474400  | 0.59910000  |
| H | 4.80400400  | -1.69055200 | 0.23715200  |
| H | 5.07758200  | -1.34593100 | 1.95651600  |
| H | 6.96754800  | -0.46003000 | 0.54472200  |
| H | 5.81159900  | 0.52554100  | -0.37618000 |
| H | 6.10711100  | 0.87243200  | 1.34087400  |
| C | 1.10676200  | 0.72540600  | 3.99780700  |
| H | 0.57215700  | 1.40661000  | 4.66606600  |
| H | 1.73460200  | 0.08185500  | 4.62531300  |
| H | 1.76048600  | 1.31985400  | 3.35693800  |
| C | -0.53854800 | -2.32692500 | 0.65011100  |
| C | -1.50201900 | -3.03379200 | -0.01932100 |
| C | -2.84710900 | -2.57302100 | -0.03465800 |
| C | -3.11811500 | -1.37672300 | 0.68553700  |
| C | -2.09980900 | -0.71207000 | 1.30985700  |
| N | -0.83314700 | -1.19253100 | 1.32725300  |
| H | 0.49898900  | -2.63820900 | 0.69012400  |
| H | -1.20178300 | -3.93089500 | -0.54287200 |
| H | -4.10368500 | -0.93238200 | 0.70844600  |
| H | -2.24894400 | 0.24069500  | 1.80342400  |

|   |             |             |             |
|---|-------------|-------------|-------------|
| N | -3.81289500 | -3.22647200 | -0.70321500 |
| C | -3.48939200 | -4.41798500 | -1.47645000 |
| H | -2.77043500 | -4.19010400 | -2.27113500 |
| H | -3.07500100 | -5.20055800 | -0.83256700 |
| H | -4.40060600 | -4.79993700 | -1.93358900 |
| C | -5.16527100 | -2.68658200 | -0.74356700 |
| H | -5.58248300 | -2.59915100 | 0.26481600  |
| H | -5.18364200 | -1.70165500 | -1.22389400 |
| H | -5.79725800 | -3.36169400 | -1.31747800 |
| C | -0.34896600 | 2.03392800  | -0.10455900 |
| N | 0.85052600  | 0.03276500  | -0.39310500 |
| N | -0.34710800 | 0.79088600  | -0.57836100 |
| O | 0.58946300  | 2.68808700  | 0.41687300  |
| C | -1.71166600 | 2.70021000  | -0.22102200 |
| C | -2.80008400 | 2.08554600  | -0.85376400 |
| C | -1.88121200 | 3.97242600  | 0.33101100  |
| C | -4.03223300 | 2.73196000  | -0.92609800 |
| H | -2.65822200 | 1.10275300  | -1.29176900 |
| C | -3.11558800 | 4.61850600  | 0.26397900  |
| H | -1.02459800 | 4.43844400  | 0.80846900  |
| C | -4.19620000 | 3.99974000  | -0.36355500 |
| H | -4.86691800 | 2.24971300  | -1.42844100 |
| H | -3.23351000 | 5.60705300  | 0.69915700  |
| H | -5.15729300 | 4.50306300  | -0.42141200 |
| C | 1.81956800  | 0.15422500  | -1.43063300 |



|   |            |             |             |
|---|------------|-------------|-------------|
| C | 2.58731900 | -0.96683200 | -1.77921900 |
| C | 1.99136200 | 1.34123500  | -2.15131200 |
| C | 3.53438400 | -0.88946700 | -2.79773100 |
| H | 2.42174200 | -1.90635700 | -1.25825600 |
| C | 2.92539100 | 1.40642700  | -3.18278800 |
| H | 1.40283800 | 2.21047800  | -1.88137400 |
| C | 3.70901400 | 0.29865200  | -3.50710000 |
| H | 4.11965100 | -1.76884700 | -3.05311100 |
| H | 3.04813400 | 2.33720000  | -3.72951000 |
| H | 4.43792600 | 0.35734700  | -4.30984100 |
